# Supplementary material for: Anticancer Activity of Chalcones and Its Derivatives: Review and In Silico Studies
Source: MDPI journal article supplement (doi:10.3390/molecules28104009), 2023-05-10
Supplement: s1 [file s1]

# Anticancer Activity of Chalcones and Its Derivatives: Review and In Silico Studies

Fernando Ferreira Leite, Natália Ferreira de Sousa, Bruno Hanrry Melo de Oliveira, Gabrielly Diniz Duarte, Maria Denise Leite Ferreira, Marcus Tullius Scotti, José Maria Barbosa Filho, Luís Cezar Rodrigues, Ricardo Olímpio de Moura, Francisco Jaime Bezerra Mendonça-Junior and Luciana Scotti

## Supplementary Material

**Tabela S1:** Anticancer activity of chalcone-like compounds for various types of cancer with their respective cell lineage.

| ID  | Smiles                                                                              | Activity | Unit | Assessment Method | Cell Lineage |
|-----|-------------------------------------------------------------------------------------|----------|------|-------------------|--------------|
| 1.  | <chem>COC1=CC(OC)=C(C(=O)\C=C\C2=CC=CC=C2)C(O)=C1</chem>                            | 25       | μM   | IC50              | LoVo         |
| 2.  | <chem>COC1=CC2=C(C(=O)CC(O2)C2=CC=CC=C2)C(OC)=C1</chem>                             | 50       | μM   | IC50              | LoVo         |
| 3.  | <chem>CC1=NC(C)=C(C)N=C1\C=C\C(=O)C1=CC=CO1</chem>                                  | 7,9      | μM   | IC50              | A375         |
| 4.  | <chem>COC1=CC=C2OC(=CC2=C1)C(=O)\C=C\C1=C(C)N=C(C)C(C)=N1</chem>                    | 5,16     | μM   | IC50              | A375         |
| 5.  | <chem>CC1=CSC(=C1)C1=CC=C(C=C1)C(=O)\C=C\C1=NC(C)=C(C)N=C1C</chem>                  | 3,68     | μM   | IC50              | A375         |
| 6.  | <chem>CCOC1=CC=C(C=C1)C(=O)\C=C\C1=CC=C(Cl)C=C1</chem>                              | 49,17    | μM   | IC50              | A-375        |
| 7.  | <chem>CCOC1=CC=C(C=C1)C(=O)\C=C\C1=CC=C(Br)C=C1</chem>                              | 40,76    | μM   | ic50              | A-375        |
| 8.  | <chem>CCOC1=CC=C(C=C1)C(=O)\C=C\C1=CC=C(C=C1)N(O)O</chem>                           | 76,01    | μM   | ic50              | A-375        |
| 9.  | <chem>CCOC1=CC=C(C=C1)C(=O)\C=C\C1=CC=C(OC)C=C1</chem>                              | 71,19    | μM   | ic50              | A-375        |
| 10. | <chem>CCOC1=CC=C(C=C1)C(=O)\C=C\C1=CC=C(OC)C(OC)=C1</chem>                          | 47,06    | μM   | ic50              | A-375        |
| 11. | <chem>O=C(\C=C\C1=CC=C(OCCCCOC2=CC=C(\C=C\C(=O)C3=CC=CO3)C=C2)C=C1)C1=CC=CO1</chem> | 26,1     | μM   | IC50              | A431         |

|     |                                                                                                                                          |             |       |      |       |
|-----|------------------------------------------------------------------------------------------------------------------------------------------|-------------|-------|------|-------|
| 12. | <chem>O=C(\C=C\C1=CC=C(OCCCCOC2=CC=C(\C=C\C(=O)C3=CC=CO3)C=C2)C=C1)C1=CC=CO1</chem>                                                      | 14,4        | μM    | IC50 | A431  |
| 13. | <chem>[H]N1C2CCCCC2N([H])[Pt]11(Cl)(OC(=O)CCCC(=O)OC2=C(OC)C=CC(\C=C\C(=O)C3=CC(OC)=C(OC)C(OC)=C3)=C2)OC(=O)C(=O)O1</chem>               | 0,39        | μM    | IC50 | A549  |
| 14. | <chem>COC1=CC=C(C=C1)C1ON=C2C1SC(N2C1=CC=C(Cl)C=C1)C1=CC(CC2=CC(C3SC4C(ON=C4N3C3=CC=C(Cl)C=C3)C3=CC=C(OC)C=C3)=C(OC)C=C2)=CC=C1OC</chem> | 35,29       | μg/mL | IC50 | A549  |
| 15. | <chem>CC1=CC=C(C=C1)S(=O)(=O)NC1=CC=C(\C=C\C2=CC=C(F)C=C2)C=C1C(=O)\C=C\C1=CC=C(F)C=C1</chem>                                            | 5,4         | μM    | IC50 | A549  |
| 16. | <chem>COC1=CC=C(\C=C\C2=CC=C(NS(=O)(=O)C3=CC=C(C)C=C3)C(=C2)C(=O)\C=C\C2=CC=C(F)C=C2)C=C1</chem>                                         | 50,3        | μM    | IC50 | A549  |
| 17. | <chem>CC(C)C(NC1=NC(NC2=CC=C(C=C2)C(=O)\C=C\C2=CC=C(Cl)C=C2)=NC(NC(C(C)C)C(O)=O)=N1)C(O)=O</chem>                                        | 24,5        | μM    | IC50 | A549  |
| 18. | <chem>OC(=O)C(CC1=CC=CC=C1)NC1=NC(NC2=CC=C(C=C2)C(=O)\C=C\C2=CC=C(Cl)C=C2)=NC(NC(CC2=CC=CC=C2)C(O)=O)=N1</chem>                          | 17          | μM    | IC50 | A549  |
| 19. | <chem>CC1=C(C(=O)\C=C\C2=CC=CC=C2)C(=NN1C1=CC=C(C=C1)[N+])([O-])=O)C1=CC=CS1</chem>                                                      | 27,7        | μM    | IC50 | A549  |
| 20. | <chem>CON1C=C(C(=O)\C=C\C2=C(OC)C=C(OC)C=C2OC)C2=CC=CC=C12</chem>                                                                        | < 7         | μM    | IC50 | A549  |
| 21. | <chem>O=C(\C=C\C1=CC=C(OCCOC2=CC=C(\C=C\C(=O)C3=CC=CO3)C=C2)C=C1)C1=CC=CO1</chem>                                                        | 24,9        | μM    | IC50 | A549  |
| 22. | <chem>[H]C1=CC(OC)=C([H])C=C1C1CC(=NN1C(C)=O)C1=C([H])C2=C(OCO2)C([H])=C1OC</chem>                                                       | 4.32 a 0.28 | μM    | IC50 | A-549 |
| 23. | <chem>[H]C1=CC2=C(OCO2)C=C1C1CC(=NN1C(C)=O)C1=C([H])C(OC)=C(OC)C(O)C=C1[H]</chem>                                                        | >100        | μM    | IC50 | A-549 |
| 24. | <chem>[H]C1=CC2=C(OCO2)C=C1C1CC(=NN1C(C)=O)C1=C([H])C([H])=C(C)C([H])=C1[H]</chem>                                                       | >100        | μM    | IC50 | A-549 |
| 25. | <chem>[H]C1=CC2=C(OCO2)C=C1C1CC(=NN1C(C)=O)C1=C([H])C([H])=C([H])C([H])=C1OC</chem>                                                      | >100        | μM    | IC50 | A-549 |

|     |                                                                               |              |       |      |           |
|-----|-------------------------------------------------------------------------------|--------------|-------|------|-----------|
| 26. | [H]C1=CC2=C(OCO2)C=C1C1CC(=NN1C(C)=O)C1=C([H])C([H])=C2OCOC2=C1[H]            | 60.89 a 4.30 | μM    | IC50 | A-549     |
| 27. | [H]C1=CC2=C(OCO2)C=C1C1CC(=NN1C(C)=O)C1=C([H])C([H])=C(OC(F)(F)F)C([H])=C1[H] | 21.46 a 4.26 | μM    | IC50 | A-549     |
| 28. | [H]C1=CC2=C(OCO2)C=C1C1CC(=NN1C(C)=O)C1=C([H])C([H])=C(OC)C([H])=C1[H]        | >100         | μM    | IC50 | A-549     |
| 29. | [H]C1=C([H])C(=C([H])C([H])=C1OC)C1=NN(C(C1)C1=CC2=C(OCO2)C=C1OC)C(C)=O       | >100         | μM    | IC50 | A-549     |
| 30. | [H]C1=CC(O)=C([H])C=C1C1CC(=NN1C(C)=O)C1=C(OC)C([H])=C2OCSC2=C1[H]            | 79.46 a 4.97 | μM    | IC50 | A-549     |
| 31. | CC1=NC(C)=C(C)N=C1\C=C\C(=O)C1=CC=CO1                                         | 5,11         | μM    | IC50 | A-549     |
| 32. | COC1=CC=C2OC(=CC2=C1)C(=O)\C=C\C1=C(C)N=C(C)C(C)=N1                           | 5,77         | μM    | IC50 | A-549     |
| 33. | CC1=CSC(=C1)C1=CC=C(C=C1)C(=O)\C=C\C1=NC(C)=C(C)N=C1C                         | 5,39         | μM    | IC50 | A-549     |
| 34. | COC1=CC(OC)=C(C(=O)\C=C\C2=CC=CC=C2)C(O)=C1                                   | 11           | μg/ml | IC50 | A549      |
| 35. | [H]C1=C([H])C(=CC=C1\C=C\C(=C)C1=C(C)N(N=N1)C1=CC=C(Br)C=C1)N(C)C             | 98,13        | μM    | IC50 | A549/ATCC |
| 36. | [H]C1=C(OC)C(OC)=CC=C1\C=C\C(=C)C1=C(C)N(N=N1)C1=CC=C(Br)C=C1                 | 73,63        | μM    | IC50 | A549/ATCC |
| 37. | [H]C1=C([H])C(\C=C\C(=O)C2=C(C)N(N=N2)C2=CC=C(Br)C=C2)=CC=C1OC                | 101,75       | μM    | IC50 | A549/ATCC |
| 38. | [H]C1=CC=C(\C=C\C(=O)C2=C(C)N(N=N2)C2=CC=C(Br)C=C2)C(OC)=C1[H]                | 85,19        | μM    | IC50 | A549/ATCC |
| 39. | [H]C1=CC=C(\C=C\C(=O)C2=C(C)N(N=N2)C2=CC=C(Br)C=C2)C([H])=C1[N+][O-]=O        | 91,07        | μM    | IC50 | A549/ATCC |
| 40. | [H]C1=C([H])C(\C=C\C(=O)C2=C(C)N(N=N2)C2=CC=C(Br)C=C2)=CC=C1C1                | 101,83       | μM    | IC50 | A549/ATCC |
| 41. | [H]C1=C([H])C(=CC=C1\C=C\C(=O)C1=C(C)N(N=N1)C1=CC=C(F)C=C1)N(C)C              | 95,66        | μM    | IC50 | A549/ATCC |

|     |                                                                                           |        |    |      |           |
|-----|-------------------------------------------------------------------------------------------|--------|----|------|-----------|
| 42. | <chem>[H]C1=C(OC)C(OC)=CC=C1\C=C\C(=O)C1=C(C)N(N=N1)C1=CC=C(F)C=C1</chem>                 | 85,95  | μM | IC50 | A549/ATCC |
| 43. | <chem>[H]C1=C([H])C(\C=C\C(=O)C2=C(C)N(N=N2)C2=CC=C(F)C=C2)=CC=C1O</chem>                 | 93     | μM | IC50 | A549/ATCC |
| 44. | <chem>[H]C1=CC=C(\C=C\C(=O)C2=C(C)N(N=N2)C2=CC=C(F)C=C2)C(OC)=C1[H]</chem>                | 41,66  | μM | IC50 | A549/ATCC |
| 45. | <chem>[H]C1=C([H])C(=CC=C1\C=C\C(=O)C1=C(C)N(N=N1)C1=CC=C(C=C1)C(O)=O)N(C)C</chem>        | 95,7   | μM | IC50 | A549/ATCC |
| 46. | <chem>[H]C1=C(OC)C(OC)=CC=C1\C=C\C(=O)C1=C(C)N(N=N1)C1=CC=C(C=C1)C(O)=O</chem>            | 97,55  | μM | IC50 | A549/ATCC |
| 47. | <chem>[H]C1=C([H])C(\C=C\C(=O)C2=C(C)N(N=N2)C2=CC=C(C=C2)C(O)=O)=CC=C1OC</chem>           | 100,93 | μM | IC50 | A549/ATCC |
| 48. | <chem>[H]C1=CC=C(\C=C\C(=O)C2=C(C)N(N=N2)C2=CC=C(C=C2)C(O)=O)C(OC)=C1[H]</chem>           | 90,31  | μM | IC50 | A549/ATCC |
| 49. | <chem>COC1=CC(OC)=C(C(=O)\C=C\C2=C(OC)C=CC=C2OC)C(OC)=C1</chem>                           | 0,17   | μM | IC50 | ABCG2     |
| 50. | <chem>COC1=CC=C(\C=C\C(=O)C2=CC=C(NC3=C4C=C(OC)C(OC)=CC4=NC=N3)C=C2)C=C1OC</chem>         | 0,19   | μM | IC50 | ABCG2     |
| 51. | <chem>COC1=CC=C(C=C1OC)C(=O)\C=C\C1=CN(C)C2=CC=C(C=C12)C(=O)C1=C</chem>                   | 0,96   | μM | GI50 | AW13516   |
| 52. | <chem>COC1=CC(\C=C\C(=O)C2=CC=C3OC(=O)N(CN4CCCCC4)C3=C2)=CC(OC)=C1OC</chem>               | 3,6    | μM | IC50 | BV-173    |
| 53. | <chem>COC1=CC(\C=C\C(=O)C2=CC=C3OC(=O)N(CN4CCOCC4)C3=C2)=CC(OC)=C1OC</chem>               | 6,4    | μM | IC50 | BV-173    |
| 54. | <chem>COC1=CC(\C=C\C(=O)C2=CC=C3OC(=O)N(CN4CCSCC4)C3=C2)=CC(OC)=C1OC</chem>               | 5,1    | μM | IC50 | BV-173    |
| 55. | <chem>COC1=CC(\C=C\C(=O)C2=CC=C3OC(=O)N(CN4CCN(CC5=CC=CC=C5)CC4)C3=C2)=CC(OC)=C1OC</chem> | 5,5    | μM | IC50 | BV-173    |

|     |                                                                                                     |        |    |                 |          |
|-----|-----------------------------------------------------------------------------------------------------|--------|----|-----------------|----------|
| 56. | <chem>COC1=CC(\C=C\C(=O)C2=CC=C3OC(=O)N(CN4CCN(CC4)C4=C(OC)C=C=C4)C3=C2)=CC(OC)=C1OC</chem>         | 5,9    | μM | IC50            | BV-173   |
| 57. | <chem>O=C(\C=C\C1=COC2=CC=CC=C2C1=O)C1=CC2=C(OC1=O)C=CC=C2</chem>                                   | 2,96   | μM | IC50            | CAL27    |
| 58. | <chem>O=C(\C=C\C1=NNC=C1C1=CC2=C(OC1=O)C=CC=C2)C1=CC2=C(OC1=O)C=CC=C2</chem>                        | 2,97   | μM | IC50            | CAL27    |
| 59. | <chem>O=C(\C=C\C1=CN(N=C1C1=CN=CC=N1)C1=CC=CC=C1)C1=CC2=CC=CC=C2OC1=O</chem>                        | 2,82   | μM | IC50            | CAL27    |
| 60. | <chem>COC1=CC(\C=C\C(=O)C2=CC=C(Br)C=C2)=CC=C1OCCOC1=CC=C(\C=C\C(=O)C2=CC=C(Br)C=C2)C=C1OC</chem>   | 64,1   | %  | % sobrevivência | Cal51    |
| 61. | <chem>COC1=CC(\C=C\C(=O)C2=CC=C(N)C=C2)=CC=C1OCCOC1=CC=C(\C=C\C(=O)C2=CC=C(N)C=C2)C=C1OC</chem>     | 60,2   | %  | % sobrevivência | Cal51    |
| 62. | <chem>COC1=CC=C(C=C1)C(=O)\C=C\C1=CC=C(OCCOC2=CC=C(\C=C\C(=O)C3=CC=C(OC)C=C3)C=C2OC)C(OC)=C1</chem> | 50,4   | %  | % sobrevivência | Cal51    |
| 63. | <chem>[O-][N+](=O)C1=CC(\C=C\C(=O)C2=CC=CC=C2)=CC=C1</chem>                                         | 8,9    | μM | IC50            | CCRF-CEM |
| 64. | <chem>FC(F)(F)C1=CC=CC=C1\C=C\C(=O)C1=CC=CC=C1</chem>                                               | 7,5    | μM | IC50            | CCRF-CEM |
| 65. | <chem>[O-][N+](=O)C1=CC=CC(=C1)C(=O)\C=C\C1=CC=CC=C1</chem>                                         | 6,1    | μM | IC50            | CCRF-CEM |
| 66. | <chem>FC(F)(F)C1=CC=CC(=C1)C(=O)\C=C\C1=CC=CC=C1</chem>                                             | 11,4   | μM | IC50            | CCRF-CEM |
| 67. | <chem>[H]C1=C([H])C(=CC=C1\C=C\C(=C)C1=C(C)N(N=N1)C1=CC=C(Br)C=C1)N(C)C</chem>                      | 108,74 | μM | IC50            | Colo 205 |
| 68. | <chem>[H]C1=C(OC)C(OC)=CC=C1\C=C\C(=C)C1=C(C)N(N=N1)C1=CC=C(Br)C=C1</chem>                          | 90,38  | μM | IC50            | Colo 205 |
| 69. | <chem>[H]C1=C([H])C(\C=C\C(=O)C2=C(C)N(N=N2)C2=CC=C(Br)C=C2)=CC=C1OC</chem>                         | 110,95 | μM | IC50            | Colo 205 |
| 70. | <chem>[H]C1=CC=C(\C=C\C(=O)C2=C(C)N(N=N2)C2=CC=C(Br)C=C2)C(OC)=C1[H]</chem>                         | 109,85 | μM | IC50            | Colo 205 |
| 71. | <chem>[H]C1=CC=C(\C=C\C(=O)C2=C(C)N(N=N2)C2=CC=C(Br)C=C2)C([H])=C1[N+][O-]=O</chem>                 | 106,46 | μM | IC50            | Colo 205 |

|     |                                                                                                                             |        |       |      |          |
|-----|-----------------------------------------------------------------------------------------------------------------------------|--------|-------|------|----------|
| 72. | [H]C1=C([H])C(\C=C\C(=O)C2=C(C)N(N=N2)C2=CC=C(Br)C=C2)=CC=C1C1                                                              | 106,09 | μM    | IC50 | Colo 205 |
| 73. | [H]C1=C([H])C(=CC=C1\C=C\C(=O)C1=C(C)N(N=N1)C1=CC=C(F)C=C1)N(C)C                                                            | 101,48 | μM    | IC50 | Colo 205 |
| 74. | [H]C1=C(OC)C(OC)=CC=C1\C=C\C(=O)C1=C(C)N(N=N1)C1=CC=C(F)C=C1                                                                | 106,57 | μM    | IC50 | Colo 205 |
| 75. | [H]C1=C([H])C(\C=C\C(=O)C2=C(C)N(N=N2)C2=CC=C(F)C=C2)=CC=C1OC                                                               | 101,97 | μM    | IC50 | Colo 205 |
| 76. | [H]C1=CC=C(\C=C\C(=O)C2=C(C)N(N=N2)C2=CC=C(F)C=C2)C(OC)=C1[H]                                                               | 72,37  | μM    | IC50 | Colo 205 |
| 77. | [H]C1=C([H])C(=CC=C1\C=C\C(=O)C1=C(C)N(N=N1)C1=CC=C(C=C1)C(O)=O)N(C)C                                                       | 105,86 | μM    | IC50 | Colo 205 |
| 78. | [H]C1=C(OC)C(OC)=CC=C1\C=C\C(=O)C1=C(C)N(N=N1)C1=CC=C(C=C1)C(O)=O                                                           | 108,62 | μM    | IC50 | Colo 205 |
| 79. | [H]C1=C([H])C(\C=C\C(=O)C2=C(C)N(N=N2)C2=CC=C(C=C2)C(O)=O)=CC=C1OC                                                          | 107,34 | μM    | IC50 | Colo 205 |
| 80. | COC1=CC(O)=CC=C1C(=O)\C=C\C1=CC=C(O)C=C1                                                                                    | 1,92   | μM    | IC50 | DND-41   |
| 81. | COC1=CC=C(C=C1)C1ON=C2C1SC(N2C1=CC=C(Cl)C=C1)C1=CC(CC2=CC(C3SC4C(ON=C4N3C3=CC=C(Cl)C=C3)C3=CC=C(OC)C=C3)=C(OC)C=C2)=CC=C1OC | 14,98  | μg/mL | IC50 | DU145    |
| 82. | CC(C)CC1=CC=C(C=C1)C1=NC2=C(SC(C1)C1=CC=CN1)C=CC=C2                                                                         | 12     | μg/mL | IC50 | DU-145   |
| 83. | CC(C)CC1=CC=C(C=C1)C1=NC2=C(SC(C1)C1=CC=CS1)C=CC=C2                                                                         | 18     | μg/mL | IC50 | DU-145   |
| 84. | CC(C)CC1=CC=C(C=C1)C1=NC2=C(SC(C1)C1=CC=C(Br)O1)C=CC=C2                                                                     | 4      | μg/mL | IC50 | DU-145   |
| 85. | NC1=NC(=CC(=N1)C1=CC=C(C=C1)[N+](=[O-])=O)C1=NC=C(Cl)N=C1                                                                   | 112    | μg/mL | IC50 | DU-145   |
| 86. | NC1=NC(=CC(=N1)C1=CC=C(F)C=C1F)C1=NC=C(Cl)N=C1                                                                              | 10     | μg/mL | IC50 | DU-145   |
| 87. | NC1=NC(=CC(=N1)C1=CC=C(Cl)C=C1Cl)C1=NC=C(Cl)N=C1                                                                            | 12     | μg/mL | IC50 | DU-145   |
| 88. | NC1=NC(=CC(=N1)C1=NC=CC=C1)C1=NC=C(Cl)N=C1                                                                                  | 5      | μg/mL | IC50 | DU-145   |

|      |                                                                                                           |       |       |      |                                          |
|------|-----------------------------------------------------------------------------------------------------------|-------|-------|------|------------------------------------------|
| 89.  | <chem>[H]C1CC[C@]2([H])[C@]1([H])CC[C@]1([H])C3=C(CC[C@@]21[H])C=C1OC(=CC(=O)C1=C3)C1=CC=CC=C1</chem>     | 5,6   | μM    | IC50 | DU-145                                   |
| 90.  | <chem>[H]C1CC[C@]2([H])[C@]1([H])CC[C@]1([H])C3=C(CC[C@@]21[H])C=C1OC(=CC(=O)C1=C3)C1=CC=C(C)C=C1</chem>  | 9,7   | μM    | IC50 | DU-145                                   |
| 91.  | <chem>[H]C1CC[C@]2([H])[C@]1([H])CC[C@]1([H])C3=C(CC[C@@]21[H])C=C1OC(=CC(=O)C1=C3)C1=CC=C(Br)C=C1</chem> | 6,2   | μM    | IC50 | DU-145                                   |
| 92.  | <chem>COC1=CC2=C(C=C1OC)C1N(CC2)C(=NN1C1=CC=CC=C1)C(=O)\C=C\C1=CC(OC)=C(OC)C(OC)=C1</chem>                | 1142  | mg/kg | LD50 | Ehrlich<br>ascites<br>carcinoma<br>cells |
| 93.  | <chem>[H]C1=C([H])C(=CC=C1\C=C\C(=C)C1=C(C)N(N=N1)C1=CC=C(Br)C=C1)N(C)C</chem>                            | 97,97 | μM    | IC50 | EKVX                                     |
| 94.  | <chem>[H]C1=C(OC)C(OC)=CC=C1\C=C\C(=C)C1=C(C)N(N=N1)C1=CC=C(Br)C=C1</chem>                                | 62,35 | μM    | IC50 | EKVX                                     |
| 95.  | <chem>[H]C1=C([H])C(\C=C\C(=O)C2=C(C)N(N=N2)C2=CC=C(Br)C=C2)=CC=C1OC</chem>                               | 96,89 | μM    | IC50 | EKVX                                     |
| 96.  | <chem>[H]C1=CC=C(\C=C\C(=O)C2=C(C)N(N=N2)C2=CC=C(Br)C=C2)C(OC)=C1[H]</chem>                               | 91,62 | μM    | IC50 | EKVX                                     |
| 97.  | <chem>[H]C1=CC=C(\C=C\C(=O)C2=C(C)N(N=N2)C2=CC=C(Br)C=C2)C([H])=C1[N+][O-]=O</chem>                       | 92,3  | μM    | IC50 | EKVX                                     |
| 98.  | <chem>[H]C1=C([H])C(\C=C\C(=O)C2=C(C)N(N=N2)C2=CC=C(Br)C=C2)=CC=C1C1</chem>                               | 93,43 | μM    | IC50 | EKVX                                     |
| 99.  | <chem>[H]C1=C([H])C(=CC=C1\C=C\C(=O)C1=C(C)N(N=N1)C1=CC=C(F)C=C1)N(C)C</chem>                             | 94,37 | μM    | IC50 | EKVX                                     |
| 100. | <chem>[H]C1=C(OC)C(OC)=CC=C1\C=C\C(=O)C1=C(C)N(N=N1)C1=CC=C(F)C=C1</chem>                                 | 82,59 | μM    | IC50 | EKVX                                     |
| 101. | <chem>[H]C1=C([H])C(\C=C\C(=O)C2=C(C)N(N=N2)C2=CC=C(F)C=C2)=CC=C1OC</chem>                                | 83,29 | μM    | IC50 | EKVX                                     |

|      |                                                                               |              |       |      |       |
|------|-------------------------------------------------------------------------------|--------------|-------|------|-------|
| 102. | [H]C1=CC=C(\ C=C\ C(=O)C2=C(C)N(N=N2)C2=CC=C(F)C=C2)C(OC)=C1[H]               | 69,31        | μM    | IC50 | EKVX  |
| 103. | [H]C1=C([H])C(=CC=C1\ C=C\ C(=O)C1=C(C)N(N=N1)C1=CC=C(C=C1)C(O)=O)N(C)C       | 93,83        | μM    | IC50 | EKVX  |
| 104. | [H]C1=C(OC)C(OC)=CC=C1\ C=C\ C(=O)C1=C(C)N(N=N1)C1=CC=C(C=C1)C(O)=O           | 96,17        | μM    | IC50 | EKVX  |
| 105. | [H]C1=C([H])C(\ C=C\ C(=O)C2=C(C)N(N=N2)C2=CC=C(C=C2)C(O)=O)=CC=C1OC          | 87,17        | μM    | IC50 | EKVX  |
| 106. | [H]C1=CC=C(\ C=C\ C(=O)C2=C(C)N(N=N2)C2=CC=C(C=C2)C(O)=O)C(OC)=C1[H]          | 83,29        | μM    | IC50 | EKVX  |
| 107. | COC1=CC(\ C=C\ C(=O)C2=CC(OC)=C(OC)C=C2)=CC(OC)=C1OC                          | 25,54        | μM    | IC50 | GL261 |
| 108. | COC1=CC=C(C=C1)C1=CC2=CC=CC=C2N=C1\ C=C\ C(=O)C1=CC=CC=C1                     | 141          | μM    | IC50 | H1299 |
| 109. | COC1=CC(OC)=C(C(=O)\ C=C\ C2=CC=CC=C2)C(O)=C1                                 | 5,1          | μg/ml | IC50 | H1299 |
| 110. | [H]C1=CC(OC)=C([H])C=C1C1CC(=NN1C(C)=O)C1=C([H])C2=C(OCO2)C([H])=C1OC         | 4.69 a 0.43  | μM    | IC50 | H226  |
| 111. | [H]C1=CC2=C(OCO2)C=C1C1CC(=NN1C(C)=O)C1=C([H])C(OC)=C(OC)C(O)=C1[H]           | 40.46 a 3.52 | μM    | IC50 | H226  |
| 112. | [H]C1=CC2=C(OCO2)C=C1C1CC(=NN1C(C)=O)C1=C([H])C([H])=C(C)C([H])=C1[H]         | 86.70 a 0.92 | μM    | IC50 | H226  |
| 113. | [H]C1=CC2=C(OCO2)C=C1C1CC(=NN1C(C)=O)C1=C([H])C([H])=C([H])C([H])=C1OC        | 86.70 a 4.70 | μM    | IC50 | H226  |
| 114. | [H]C1=CC2=C(OCO2)C=C1C1CC(=NN1C(C)=O)C1=C([H])C([H])=C2OCOC2=C1[H]            | 57.99 a 2.56 | μM    | IC50 | H226  |
| 115. | [H]C1=CC2=C(OCO2)C=C1C1CC(=NN1C(C)=O)C1=C([H])C([H])=C(OC(F)(F)F)C([H])=C1[H] | 24.36 a 2.13 | μM    | IC50 | H226  |
| 116. | [H]C1=CC2=C(OCO2)C=C1C1CC(=NN1C(C)=O)C1=C([H])C([H])=C(OC)C([H])=C1[H]        | 41.49 a 1.12 | μM    | IC50 | H226  |



|      |                                                                               |              |    |      |         |
|------|-------------------------------------------------------------------------------|--------------|----|------|---------|
| 117. | [H]C1=C([H])C(=C([H])C([H])=C1OC)C1=NN(C(C1)C1=CC2=C(OCO2)C=C1OC)C(C)=O       | 61.11 a 3.12 | μM | IC50 | H226    |
| 118. | [H]C1=CC(O)=C([H])C=C1C1CC(=NN1C(C)=O)C1=C(OC)C([H])=C2OCSC2=C1[H]            | 38.38 a 3.53 | μM | IC50 | H226    |
| 119. | [H]C1=CC(OC)=C([H])C=C1C1CC(=NN1C(C)=O)C1=C([H])C2=C(OCO2)C([H])=C1OC         | 8.40 a 1.10  | μM | IC50 | H460    |
| 120. | [H]C1=CC2=C(OCO2)C=C1C1CC(=NN1C(C)=O)C1=C([H])C(OC)=C(OC)C(O)C=C1[H]          | 43.84 a 1.12 | μM | IC50 | H460    |
| 121. | [H]C1=CC2=C(OCO2)C=C1C1CC(=NN1C(C)=O)C1=C([H])C([H])=C(C)C([H])=C1[H]         | 24.53 a 1.74 | μM | IC50 | H460    |
| 122. | [H]C1=CC2=C(OCO2)C=C1C1CC(=NN1C(C)=O)C1=C([H])C([H])=C([H])C([H])=C1OC        | 63.43 a 3.34 | μM | IC50 | H460    |
| 123. | [H]C1=CC2=C(OCO2)C=C1C1CC(=NN1C(C)=O)C1=C([H])C([H])=C2OCOC2=C1[H]            | 38.84 a 1.77 | μM | IC50 | H460    |
| 124. | [H]C1=CC2=C(OCO2)C=C1C1CC(=NN1C(C)=O)C1=C([H])C([H])=C(OC(F)(F)F)C([H])=C1[H] | 18.12 a 2.13 | μM | IC50 | H460    |
| 125. | [H]C1=CC2=C(OCO2)C=C1C1CC(=NN1C(C)=O)C1=C([H])C([H])=C(OC)C([H])=C1[H]        | 30.16 a 2.14 | μM | IC50 | H460    |
| 126. | [H]C1=C([H])C(=C([H])C([H])=C1OC)C1=NN(C(C1)C1=CC2=C(OCO2)C=C1OC)C(C)=O       | 30.16 a 2.14 | μM | IC50 | H460    |
| 127. | [H]C1=CC(O)=C([H])C=C1C1CC(=NN1C(C)=O)C1=C(OC)C([H])=C2OCSC2=C1[H]            | 43.77 a 3.97 | μM | IC50 | H460    |
| 128. | CC1=NC(C)=C(C)N=C1\C=C\C(=O)C1=CC=CO1                                         | 5,41         | μM | IC50 | H460    |
| 129. | COC1=CC=C2OC(=CC2=C1)C(=O)\C=C\C1=C(C)N=C(C)C(C)=N1                           | 5,78         | μM | IC50 | H460    |
| 130. | CC1=CSC(=C1)C1=CC=C(C=C1)C(=O)\C=C\C1=NC(C)=C(C)N=C1C                         | 2,72         | μM | IC50 | H460    |
| 131. | CC(C)(C)OC(=O)N1CCN(CC1)C(=S)SCC(=O)NC1=CC=C(C=C1)C(=O)\C=C\C1=CC=CC=C1F      | 1,1          | μM | IC50 | HAL-01  |
| 132. | COC1=C(O)C(C(=O)\C=C\C2=CC=C(O)C=C2)=C(OC)C(OC)=C1OC                          | 33,85        | μM | IC50 | HCC1954 |

|      |                                                                                     |        |    |      |          |
|------|-------------------------------------------------------------------------------------|--------|----|------|----------|
| 133. | <chem>COC1=CC(\C=C\C(=O)C2=C(OC)C(OC)=C(OC)C(OC)=C2O)=CC=C1O</chem>                 | 25,25  | μM | IC50 | HCC1954  |
| 134. | <chem>COC1=CC=C(\C=C\C(=O)C2=C(OC)C(OC)=C(OC)C(OC)=C2O)C=C1O</chem>                 | 9,28   | μM | IC50 | HCC1954  |
| 135. | <chem>COC1=C(O)C(O)=CC(\C=C\C(=O)C2=C(OC)C(OC)=C(OC)C(OC)=C2O)=C1</chem>            | 19,47  | μM | IC50 | HCC1954  |
| 136. | <chem>COC1=CC(\C=C\C(=O)C2=C(OC)C(OC)=C(OC)C(OC)=C2O)=CC(OC)=C1O</chem><br>C        | 15,98  | μM | IC50 | HCC1954  |
| 137. | <chem>[H]C1=CC=C(\C=C\C(=O)C2=C(C)N(N=N2)C2=CC=C(C=C2)C(O)=O)C(OC)=C1[H]</chem>     | 110,11 | μM | IC50 | HCC-2998 |
| 138. | <chem>[H]C1=C([H])C(=CC=C1\C=C\C(=C)C1=C(C)N(N=N1)C1=CC=C(Br)C=C1)N(C)C</chem>      | 99,87  | μM | IC50 | HCC-2998 |
| 139. | <chem>[H]C1=C(OC)C(OC)=CC=C1\C=C\C(=C)C1=C(C)N(N=N1)C1=CC=C(Br)C=C1</chem>          | 83,75  | μM | IC50 | HCC-2998 |
| 140. | <chem>[H]C1=C([H])C(\C=C\C(=O)C2=C(C)N(N=N2)C2=CC=C(Br)C=C2)=CC=C1O</chem><br>C     | 106,55 | μM | IC50 | HCC-2998 |
| 141. | <chem>[H]C1=CC=C(\C=C\C(=O)C2=C(C)N(N=N2)C2=CC=C(Br)C=C2)C(OC)=C1[H]</chem>         | 93,9   | μM | IC50 | HCC-2998 |
| 142. | <chem>[H]C1=CC=C(\C=C\C(=O)C2=C(C)N(N=N2)C2=CC=C(Br)C=C2)C([H])=C1[N+](O-)=O</chem> | 101,24 | μM | IC50 | HCC-2998 |
| 143. | <chem>[H]C1=C([H])C(\C=C\C(=O)C2=C(C)N(N=N2)C2=CC=C(Br)C=C2)=CC=C1C</chem><br>1     | 95,43  | μM | IC50 | HCC-2998 |
| 144. | <chem>[H]C1=C([H])C(=CC=C1\C=C\C(=O)C1=C(C)N(N=N1)C1=CC=C(F)C=C1)N(C)C</chem>       | 102,9  | μM | IC50 | HCC-2998 |
| 145. | <chem>[H]C1=C(OC)C(OC)=CC=C1\C=C\C(=O)C1=C(C)N(N=N1)C1=CC=C(F)C=C1</chem><br>1      | 102,85 | μM | IC50 | HCC-2998 |
| 146. | <chem>[H]C1=C([H])C(\C=C\C(=O)C2=C(C)N(N=N2)C2=CC=C(F)C=C2)=CC=C1O</chem><br>C      | 98,77  | μM | IC50 | HCC-2998 |
| 147. | <chem>[H]C1=CC=C(\C=C\C(=O)C2=C(C)N(N=N2)C2=CC=C(F)C=C2)C(OC)=C1[H]</chem><br>]     | 81,31  | μM | IC50 | HCC-2998 |

|      |                                                                                    |        |       |               |          |
|------|------------------------------------------------------------------------------------|--------|-------|---------------|----------|
| 148. | <chem>[H]C1=C([H])C(=CC=C1\C=C\C(=O)C1=C(C)N(N=N1)C1=CC=C(C=C1)C(O)=O)N(C)C</chem> | 98,69  | μM    | IC50          | HCC-2998 |
| 149. | <chem>[H]C1=C(OC)C(OC)=CC=C1\C=C\C(=O)C1=C(C)N(N=N1)C1=CC=C(C=C1)C(O)=O</chem>     | 105,62 | μM    | IC50          | HCC-2998 |
| 150. | <chem>[H]C1=C([H])C(\C=C\C(=O)C2=C(C)N(N=N2)C2=CC=C(C=C2)C(O)=O)=CC=C1OC</chem>    | 99,27  | μM    | IC50          | HCC-2998 |
| 151. | <chem>[H]C1=CC=C(\C=C\C(=O)C2=C(C)N(N=N2)C2=CC=C(C=C2)C(O)=O)C(OC)=C1[H]</chem>    | 102,41 | μM    | IC50          | HCC-2998 |
| 152. | <chem>O=C(CC1=CC=C(\C=C\C(=O)C2=NC=CN2)C=C1)NC1=CC=CC=C1</chem>                    | 45,33  | 10 μM | % crescimento | HCT116   |
| 153. | <chem>O=C(CC1=CC=C(\C=C\C(=O)C2=NC=CN2)C=C1)NC1CCCCC1</chem>                       | 70,02  | 10 μM | % crescimento | HCT116   |
| 154. | <chem>CC1=CC=C(NC(=O)CC2=CC=C(\C=C\C(=O)C3=NC=CN3)C=C2)C=C1</chem>                 | 41,34  | 10 μM | % crescimento | HCT116   |
| 155. | <chem>COC1=CC=C(NC(=O)CC2=CC=C(\C=C\C(=O)C3=NC=CN3)C=C2)C=C1</chem>                | 66,84  | 10 μM | % crescimento | HCT116   |
| 156. | <chem>CN(C)C1=CC=C(NC(=O)CC2=CC=C(\C=C\C(=O)C3=NC=CN3)C=C2)C=C1</chem>             | 52,06  | 10 μM | % crescimento | HCT116   |
| 157. | <chem>O=C(CC1=CC=C(\C=C\C(=O)C2=NC=CN2)C=C1)NC1=C2C=CC=CC2=CC=C1</chem>            | 76,31  | 10 μM | % crescimento | HCT116   |
| 158. | <chem>FC1=CC=C(NC(=O)CC2=CC=C(\C=C\C(=O)C3=NC=CN3)C=C2)C=C1</chem>                 | 27,48  | 10 μM | % crescimento | HCT116   |
| 159. | <chem>ClC1=CC=C(NC(=O)CC2=CC=C(\C=C\C(=O)C3=NC=CN3)C=C2)C=C1</chem>                | 21,1   | 10 μM | % crescimento | HCT116   |
| 160. | <chem>BrC1=CC=C(NC(=O)CC2=CC=C(\C=C\C(=O)C3=NC=CN3)C=C2)C=C1</chem>                | 17,88  | 10 μM | % crescimento | HCT116   |
| 161. | <chem>FC(F)(F)C1=CC=C(NC(=O)CC2=CC=C(\C=C\C(=O)C3=NC=CN3)C=C2)C=C1</chem>          | 23,48  | 10 μM | % crescimento | HCT116   |
| 162. | <chem>FC1=CC(NC(=O)CC2=CC=C(\C=C\C(=O)C3=NC=CN3)C=C2)=CC(F)=C1F</chem>             | 51,1   | 10 μM | % crescimento | HCT116   |
| 163. | <chem>FC1=C(F)C(F)=C(NC(=O)CC2=CC=C(\C=C\C(=O)C3=NC=CN3)C=C2)C(F)=C1F</chem>       | 91,77  | 10 μM | % crescimento | HCT116   |
| 164. | <chem>CN1C=CN=C1C(=O)\C=C\C1=CC=C(CC(=O)NC2CCCCC2)C=C1</chem>                      | 57,67  | 10 μM | % crescimento | HCT116   |
| 165. | <chem>CN1C=CN=C1C(=O)\C=C\C1=CC=C(CC(=O)NC2=CC=CC=C2)C=C1</chem>                   | 15,9   | 10 μM | % crescimento | HCT116   |
| 166. | <chem>CN1C=CN=C1C(=O)\C=C\C1=CC=C(CC(=O)NC2=CC=C(Cl)C=C2)C=C1</chem>               | 19,33  | 10 μM | % crescimento | HCT116   |
| 167. | <chem>CN1C=CN=C1C(=O)\C=C\C1=CC=C(CC(=O)NC2=CC=C(Br)C=C2)C=C1</chem>               | 19,91  | 10 μM | % crescimento | HCT116   |
| 168. | <chem>CN1C=CN=C1C(=O)\C=C\C1=CC=C(CC(=O)NC2=CC=C(F)C=C2)C=C1</chem>                | 33,11  | 10 μM | % crescimento | HCT116   |

|      |                                                                                                                           |       |       |               |        |
|------|---------------------------------------------------------------------------------------------------------------------------|-------|-------|---------------|--------|
| 169. | <chem>FC1=CC=C(NC(=O)CC2=CC=C(\C=C\C(=O)C3=NC=CN3CC3=CC=CC=C3)C=C2)C=C1</chem>                                            | 54,69 | 10 µM | % crescimento | HCT116 |
| 170. | <chem>CCN1C=CN=C1C(=O)\C=C\C1=CC=C(CC(=O)NC2=CC=C(F)C=C2)C=C1</chem>                                                      | 29,2  | 10 µM | % crescimento | HCT116 |
| 171. | <chem>CN1C=CN=C1C(=O)\C=C\C1=CC=C(CC(=O)NC2=CC=C(C=C2)C(F)(F)F)C=C1</chem>                                                | 12,97 | 10 µM | % crescimento | HCT116 |
| 172. | <chem>CN1C=CN=C1C(=O)\C=C\C1=CC=C(CC(=O)NC2=CC(F)=C(F)C(F)=C2)C=C1</chem>                                                 | 22,66 | 10 µM | % crescimento | HCT116 |
| 173. | <chem>CN1C=CN=C1C(=O)\C=C\C1=CC=C(CC(=O)NC2=C(F)C(F)=C(F)C(F)=C2F)C=C1</chem>                                             | 61,43 | 10 µM | % crescimento | HCT116 |
| 174. | <chem>CN1C=CN=C1C(=O)\C=C\C1=CC=C(CC(=O)NC2=CC(=CC(=C2)C(F)(F)F)C(F)(F)F)C=C1</chem>                                      | 68,98 | 10 µM | % crescimento | HCT116 |
| 175. | <chem>CN1C=CN=C1C(=O)\C=C\C1=CC=C(CC(=O)NC2=CC=C(C=C2)C#C)C=C1</chem>                                                     | 53,49 | 10 µM | % crescimento | HCT116 |
| 176. | <chem>O=C(CC1=CC=C(CCC(=O)C2=NC=CN2)C=C1)NC1=CC=CC=C1</chem>                                                              | 92,81 | 10 µM | % crescimento | HCT116 |
| 177. | <chem>CN1C=CN=C1C(=O)C1CC1C1=CC=C(CC(=O)NC2=CC=C(Br)C=C2)C=C1</chem>                                                      | 98,67 | 10 µM | % crescimento | HCT116 |
| 178. | <chem>O=C(CC1=CC=C(\C=C\C(=O)C2=NC=CS2)C=C1)NC1=CC=CC=C1</chem>                                                           | 84,29 | 10 µM | % crescimento | HCT116 |
| 179. | <chem>O=C(CC1=CC=C(\C=C\C(=O)C2=NC=CC=N2)C=C1)NC1=CC=CC=C1</chem>                                                         | 99,14 | 10 µM | % crescimento | HCT116 |
| 180. | <chem>OC1=CC=CC=C1C(=O)\C=C\C1=CC=C(CC(=O)NC2=CC=CC=C2)C=C1</chem>                                                        | 85,87 | 10 µM | % crescimento | HCT116 |
| 181. | <chem>OC(CC(=O)C1=CC=CC=C1O)C1=CC=C(CC(=O)NC2=CC=CC=C2)C=C1</chem>                                                        | 91,98 | 10 µM | % crescimento | HCT116 |
| 182. | <chem>CN(C)C1=CC=C(NC(=O)CC2=CC=C(\C=C\C(=O)C3=CC=CC=C3O)C=C2)C=C1</chem>                                                 | 89,56 | 10 µM | % crescimento | HCT116 |
| 183. | <chem>OC1=CC=CC=C1C(=O)\C=C\C1=CC=C(CC(=O)NC2=C3C=CC=CC3=CC=C2)C=C1</chem>                                                | 85,87 | 10 µM | % crescimento | HCT116 |
| 184. | <chem>[H]C1=CC(\C=C\C(=O)C2=CC=C(C=C2)N2C=C(CN3CCN(CC3)C3=CC4=C(C=C3F)C(=O)C(=CN4C3CC3)C(O)=O)N=N2)=CC([H])=C1[H]</chem>  | 3,57  | µM    | IC50          | HCT116 |
| 185. | <chem>[H]C1=C([H])C(Cl)=CC(\C=C\C(=O)C2=CC=C(C=C2)N2C=C(CN3CCN(CC3)C3=CC4=C(C=C3F)C(=O)C(=CN4C3CC3)C(O)=O)N=N2)=C1</chem> | 4,81  | µM    | IC50          | HCT116 |
| 186. | <chem>[H]C1=CC(\C=C\C(=O)C2=CC=C(C=C2)N2C=C(CN3CCN(CC3)C3=CC4=C(C=C3F)C(=O)C(=CN4C3CC3)C(O)=O)N=N2)=CC([H])=C1F</chem>    | 4,32  | µM    | IC50          | HCT116 |

|      |                                                                                                                                      |       |    |      |         |
|------|--------------------------------------------------------------------------------------------------------------------------------------|-------|----|------|---------|
| 187. | <chem>[H]C1=C(OC)C(OC)=CC(\C=C\C(=O)C2=CC=C(C=C2)N2C=C(CN3CCN(CC3)C3=CC4=C(C=C3F)C(=O)C(=CN4C3CC3)C(O)=O)N=N2)=C1</chem>             | 4,87  | μM | IC50 | HCT116  |
| 188. | <chem>COC1=CC(\C=C\C(=O)C2=CC=C(C=C2)N2C=C(CN3CCN(CC3)C3=CC4=C(C=C3F)C(=O)C(=CN4C3CC3)C(O)=O)N=N2)=CC(OC)=C1OC</chem>                | 2,53  | μM | IC50 | HCT116  |
| 189. | <chem>COC1=CC(OC2=CC(OC)=C(OC)C(OC)=C2)=C(C(/C=C/C3=CC=C(OC)C=C3)=O)C=C1</chem>                                                      | 6,31  | μM | IC50 | HCT116  |
| 190. | <chem>CON1C=C(C(=O)\C=C\C2=C(OC)C=C(OC)C=C2OC)C2=CC=CC=C12</chem>                                                                    | < 7   | μM | IC50 | HCT116  |
| 191. | <chem>CON1C=C(C(=O)\C=C\C2=C(OC)C=CC=C2OC)C2=CC=CC=C12</chem>                                                                        | < 7   | μM | IC50 | HCT116  |
| 192. | <chem>CON1C=C(C(=O)\C=C\C2=CC(OC)=C(OC)C(OC)=C2)C2=CC=CC=C12</chem>                                                                  | < 7   | μM | IC50 | HCT116  |
| 193. | <chem>O=C(\C=C\C1=CC=C(OCCOC2=CC=C(\C=C\C(=O)C3=CC=CO3)C=C2)C=C1)C1=CC=CO1</chem>                                                    | 13,7  | μM | IC50 | HCT116  |
| 194. | <chem>CN(C)C1=CC=C(\C=N\C2=NC(=CC(=N2)C2=CC=C(C=C2)C2=NC(\N=C\C3=CC=C(C=C3)N(C)C)=NC(=C2)C2=CC=C(Br)C=C2)C2=CC=C(Br)C=C2)C=C1</chem> | 0,01  | μM | IC50 | HCT116  |
| 195. | <chem>ClC1=CC(Cl)=C(\C=N\C2=NC(=CC(=N2)C2=CC=C(C=C2)C2=NC(\N=C\C3=CC=C(Cl)C=C3Cl)=NC(=C2)C2=CC=C(Br)C=C2)C2=CC=C(Br)C=C2)C=C1</chem> | 0,02  | μM | IC50 | HCT116  |
| 196. | <chem>[H]C1=C([H])C(=CC=C1\C=C\C(=C)C1=C(C)N(N=N1)C1=CC=C(Br)C=C1)N(C)C</chem>                                                       | 84,83 | μM | IC50 | HCT-116 |
| 197. | <chem>[H]C1=C(OC)C(OC)=CC=C1\C=C\C(=C)C1=C(C)N(N=N1)C1=CC=C(Br)C=C1</chem>                                                           | 5,41  | μM | IC50 | HCT-116 |
| 198. | <chem>[H]C1=C([H])C(\C=C\C(=O)C2=C(C)N(N=N2)C2=CC=C(Br)C=C2)=CC=C1OC</chem>                                                          | 97,89 | μM | IC50 | HCT-116 |
| 199. | <chem>[H]C1=CC=C(\C=C\C(=O)C2=C(C)N(N=N2)C2=CC=C(Br)C=C2)C(OC)=C1[H]</chem>                                                          | 66,23 | μM | IC50 | HCT-116 |
| 200. | <chem>[H]C1=CC=C(\C=C\C(=O)C2=C(C)N(N=N2)C2=CC=C(Br)C=C2)C([H])=C1[N+][O-]=O</chem>                                                  | 52,16 | μM | IC50 | HCT-116 |
| 201. | <chem>[H]C1=C([H])C(\C=C\C(=O)C2=C(C)N(N=N2)C2=CC=C(Br)C=C2)=CC=C1C1</chem>                                                          | 84,46 | μM | IC50 | HCT-116 |

|      |                                                                         |             |    |      |         |
|------|-------------------------------------------------------------------------|-------------|----|------|---------|
| 202. | [H]C1=C([H])C(=CC=C1\C=C\C(=O)C1=C(C)N(N=N1)C1=CC=C(F)C=C1)N(C)C        | 96,53       | μM | IC50 | HCT-116 |
| 203. | [H]C1=C(OC)C(OC)=CC=C1\C=C\C(=O)C1=C(C)N(N=N1)C1=CC=C(F)C=C1            | 64,06       | μM | IC50 | HCT-116 |
| 204. | [H]C1=C([H])C(\C=C\C(=O)C2=C(C)N(N=N2)C2=CC=C(F)C=C2)=CC=C1O            | 82,6        | μM | IC50 | HCT-116 |
| 205. | [H]C1=CC=C(\C=C\C(=O)C2=C(C)N(N=N2)C2=CC=C(F)C=C2)C(OC)=C1[H]           | 10,68       | μM | IC50 | HCT-116 |
| 206. | [H]C1=C([H])C(=CC=C1\C=C\C(=O)C1=C(C)N(N=N1)C1=CC=C(C=C1)C(O)=O)N(C)C   | 94,09       | μM | IC50 | HCT-116 |
| 207. | [H]C1=C(OC)C(OC)=CC=C1\C=C\C(=O)C1=C(C)N(N=N1)C1=CC=C(C=C1)C(O)=O       | 91,62       | μM | IC50 | HCT-116 |
| 208. | [H]C1=C([H])C(\C=C\C(=O)C2=C(C)N(N=N2)C2=CC=C(C=C2)C(O)=O)=CC=C1OC      | 87,37       | μM | IC50 | HCT-116 |
| 209. | [H]C1=CC=C(\C=C\C(=O)C2=C(C)N(N=N2)C2=CC=C(C=C2)C(O)=O)C(OC)=C1[H]      | 67,98       | μM | IC50 | HCT-116 |
| 210. | COC1=CC=C(\C=C\C(=O)CC(C)C)C=C1OC                                       | 6.85 ± 0.71 | μM | IC50 | HCT-116 |
| 211. | COC1=CC(\C=C\C(=O)CC(C)C)=CC=C1OCC1=CC=CC=C1                            | 7.9 ± 1.37  | μM | IC50 | HCT-116 |
| 212. | CCCCN1C(=O)C(\C=C\C(=O)\C=C\C2=CC3=C(C=CC=C3)N(CCCC)C2=O)=CC2=C1C=CC=C2 | 0,16        | μM | GI50 | HCT-116 |
| 213. | [H]C1=C([H])C(=CC=C1\C=C\C(=C)C1=C(C)N(N=N1)C1=CC=C(Br)C=C1)N(C)C       | 91,53       | μM | IC50 | HCT-15  |
| 214. | [H]C1=C(OC)C(OC)=CC=C1\C=C\C(=C)C1=C(C)N(N=N1)C1=CC=C(Br)C=C1           | 60,73       | μM | IC50 | HCT-15  |
| 215. | [H]C1=C([H])C(\C=C\C(=O)C2=C(C)N(N=N2)C2=CC=C(Br)C=C2)=CC=C1O           | 96,87       | μM | IC50 | HCT-15  |
| 216. | [H]C1=CC=C(\C=C\C(=O)C2=C(C)N(N=N2)C2=CC=C(Br)C=C2)C(OC)=C1[H]          | 73,51       | μM | IC50 | HCT-15  |

|      |                                                                                             |        |    |      |         |
|------|---------------------------------------------------------------------------------------------|--------|----|------|---------|
| 217. | <chem>[H]C1=CC=C(\ C=C\ C(=O)C2=C(C)N(N=N2)C2=CC=C(Br)C=C2)C([H])=C1[N+][O-]=O</chem>       | 81,47  | μM | IC50 | HCT-15  |
| 218. | <chem>[H]C1=C([H])C(\ C=C\ C(=O)C2=C(C)N(N=N2)C2=CC=C(Br)C=C2)=CC=C1C1</chem>               | 92,13  | μM | IC50 | HCT-15  |
| 219. | <chem>[H]C1=C([H])C(=CC=C1\ C=C\ C(=O)C1=C(C)N(N=N1)C1=CC=C(F)C=C1)N(C)C</chem>             | 90,67  | μM | IC50 | HCT-15  |
| 220. | <chem>[H]C1=C(OC)C(OC)=CC=C1\ C=C\ C(=O)C1=C(C)N(N=N1)C1=CC=C(F)C=C1</chem>                 | 63,7   | μM | IC50 | HCT-15  |
| 221. | <chem>[H]C1=C([H])C(\ C=C\ C(=O)C2=C(C)N(N=N2)C2=CC=C(F)C=C2)=CC=C1OC</chem>                | 79,72  | μM | IC50 | HCT-15  |
| 222. | <chem>[H]C1=CC=C(\ C=C\ C(=O)C2=C(C)N(N=N2)C2=CC=C(F)C=C2)C(OC)=C1[H]</chem>                | 22,93  | μM | IC50 | HCT-15  |
| 223. | <chem>[H]C1=C([H])C(=CC=C1\ C=C\ C(=O)C1=C(C)N(N=N1)C1=CC=C(C=C1)C(O)=O)N(C)C</chem>        | 95,33  | μM | IC50 | HCT-15  |
| 224. | <chem>[H]C1=C(OC)C(OC)=CC=C1\ C=C\ C(=O)C1=C(C)N(N=N1)C1=CC=C(C=C1)C(O)=O</chem>            | 89,58  | μM | IC50 | HCT-15  |
| 225. | <chem>[H]C1=C([H])C(\ C=C\ C(=O)C2=C(C)N(N=N2)C2=CC=C(C=C2)C(O)=O)=CC=C1OC</chem>           | 105,12 | μM | IC50 | HCT-15  |
| 226. | <chem>[H]C1=CC=C(\ C=C\ C(=O)C2=C(C)N(N=N2)C2=CC=C(C=C2)C(O)=O)C(OC)=C1[H]</chem>           | 71,57  | μM | IC50 | HCT-15  |
| 227. | <chem>COC1=CC(\ C=C\ C(=O)C2=CC=C3OC(=O)N(CN4CCCCC4)C3=C2)=CC(OC)=C1OC</chem>               | 20,5   | μM | IC50 | HD-MY-Z |
| 228. | <chem>COC1=CC(\ C=C\ C(=O)C2=CC=C3OC(=O)N(CN4CCOCC4)C3=C2)=CC(OC)=C1OC</chem>               | 48,2   | μM | IC50 | HD-MY-Z |
| 229. | <chem>COC1=CC(\ C=C\ C(=O)C2=CC=C3OC(=O)N(CN4CCSCC4)C3=C2)=CC(OC)=C1OC</chem>               | 14,8   | μM | IC50 | HD-MY-Z |
| 230. | <chem>COC1=CC(\ C=C\ C(=O)C2=CC=C3OC(=O)N(CN4CCN(CC5=CC=CC=C5)CC4)C3=C2)=CC(OC)=C1OC</chem> | 21,4   | μM | IC50 | HD-MY-Z |

|      |                                                                                             |              |    |      |         |
|------|---------------------------------------------------------------------------------------------|--------------|----|------|---------|
| 231. | <chem>COC1=CC(\C=C\C(=O)C2=CC=C3OC(=O)N(CN4CCN(CC4)C4=C(OC)C=C=C4)C3=C2)=CC(OC)=C1OC</chem> | 20           | μM | IC50 | HD-MY-Z |
| 232. | <chem>[H]C1=CC(OC)=C([H])C=C1C1CC(=NN1C(C)=O)C1=C([H])C2=C(OCO2)C([H])=C1OC</chem>          | 20.95 a 2.34 | μM | IC50 | HEK293  |
| 233. | <chem>[H]C1=CC2=C(OCO2)C=C1C1CC(=NN1C(C)=O)C1=C([H])C(OC)=C(OC)C(OC)=C1[H]</chem>           | > 100        | μM | IC50 | HEK293  |
| 234. | <chem>[H]C1=CC2=C(OCO2)C=C1C1CC(=NN1C(C)=O)C1=C([H])C([H])=C(C)C([H])=C1[H]</chem>          | > 100        | μM | IC50 | HEK293  |
| 235. | <chem>[H]C1=CC2=C(OCO2)C=C1C1CC(=NN1C(C)=O)C1=C([H])C([H])=C([H])C([H])=C1OC</chem>         | > 100        | μM | IC50 | HEK293  |
| 236. | <chem>[H]C1=CC2=C(OCO2)C=C1C1CC(=NN1C(C)=O)C1=C([H])C([H])=C2OCOC2=C1[H]</chem>             | 46.99 a 3.18 | μM | IC50 | HEK293  |
| 237. | <chem>[H]C1=CC2=C(OCO2)C=C1C1CC(=NN1C(C)=O)C1=C([H])C([H])=C(OC(F)(F)F)C([H])=C1[H]</chem>  | 42.99 a 1.23 | μM | IC50 | HEK293  |
| 238. | <chem>[H]C1=CC2=C(OCO2)C=C1C1CC(=NN1C(C)=O)C1=C([H])C([H])=C(OC)C([H])=C1[H]</chem>         | > 100        | μM | IC50 | HEK293  |
| 239. | <chem>[H]C1=C([H])C(=C([H])C([H])=C1OC)C1=NN(C(C1)C1=CC2=C(OCO2)C=C1OC)C(C)=O</chem>        | > 100        | μM | IC50 | HEK293  |
| 240. | <chem>[H]C1=CC(O)=C([H])C=C1C1CC(=NN1C(C)=O)C1=C(OC)C([H])=C2OCSC2=C1[H]</chem>             | 34.43 a 2.01 | μM | IC50 | HEK293  |
| 241. | <chem>C1C(NN=C1C1=C2C=CC=CC2=CC2=C1C=CC=C2)C1=CC=CC=C1</chem>                               | 0,22         | μM | IC50 | HeLa    |
| 242. | <chem>C1C1=CC=C(C=C1)C1CC(=NN1)C1=C2C=CC=CC2=CC2=C1C=CC=C2</chem>                           | 25           | μM | IC50 | HeLa    |
| 243. | <chem>FC1=CC=C(C=C1)C1CC(=NN1)C1=C2C=CC=CC2=CC2=C1C=CC=C2</chem>                            | 29,56        | μM | IC50 | HeLa    |
| 244. | <chem>CC1=CC=C(C=C1)C1CC(=NN1)C1=C2C=CC=CC2=CC2=C1C=CC=C2</chem>                            | 2,03         | μM | IC50 | HeLa    |
| 245. | <chem>C1C1=CC(=CC=C1)C1CC(=NN1)C1=C2C=CC=CC2=CC2=C1C=CC=C2</chem>                           | 2,58         | μM | IC50 | HeLa    |
| 246. | <chem>[O-][N+](=O)C1=CC=C(C=C1)C1CC(=NN1)C1=C2C=CC=CC2=CC2=C1C=CC=C2</chem>                 | 27,29        | μM | IC50 | HeLa    |
| 247. | <chem>BrC1=CC=C(C=C1)C1CC(=NN1)C1=C2C=CC=CC2=CC2=C1C=CC=C2</chem>                           | 1,96         | μM | IC50 | HeLa    |



|      |                                                                                                                                               |       |       |      |      |
|------|-----------------------------------------------------------------------------------------------------------------------------------------------|-------|-------|------|------|
| 248. | <chem>FC1=CC(=CC=C1)C1CC(=NN1)C1=C2C=CC=CC2=CC2=C1C=CC=C2</chem>                                                                              | 1,1   | μM    | IC50 | HeLa |
| 249. | <chem>[O-][N+](=O)C1=CC(=CC=C1)C1CC(=NN1)C1=C2C=CC=CC2=CC2=C1C=CC=C2</chem>                                                                   | 1,3   | μM    | IC50 | HeLa |
| 250. | <chem>CN(C)C1=CC=C(C=C1)C1CC(=NN1)C1=C2C=CC=CC2=CC2=C1C=CC=C2</chem>                                                                          | 0,3   | μM    | IC50 | HeLa |
| 251. | <chem>C1C(NN=C1C1=C2C=CC=CC2=CC2=C1C=CC=C2)C1=CC=C(C=C1)C1=CC=C1</chem><br>O1                                                                 | 1,88  | μM    | IC50 | HeLa |
| 252. | <chem>C1C(NN=C1C1=C2C=CC=CC2=CC2=C1C=CC=C2)C1=CC=CO1</chem>                                                                                   | 0,3   | μM    | IC50 | HeLa |
| 253. | <chem>COC1=CC(=CC(OC)=C1OC)C1CC(=NN1)C1=C2C=CC=CC2=CC2=C1C=CC=C2</chem>                                                                       | 0,1   | μM    | IC50 | HeLa |
| 254. | <chem>COC1=C(OC)C=C(C=C1)C1CC(=NN1)C1=C2C=CC=CC2=CC2=C1C=CC=C2</chem>                                                                         | 0,25  | μM    | IC50 | HeLa |
| 255. | <chem>COC1=CC=C(C=C1)C1CC(=NN1)C1=C2C=CC=CC2=CC2=C1C=CC=C2</chem>                                                                             | 0,25  | μM    | IC50 | HeLa |
| 256. | <chem>C1C(NN=C1C1=C2C=CC=CC2=CC2=C1C=CC=C2)C1=CC=NC=C1</chem>                                                                                 | 35    | μM    | IC50 | HeLa |
| 257. | <chem>COC1=CC(OC)=C(C=C1)C(=O)\C=C\C1=CC(OC)=C(OC)C(OC)=C1</chem>                                                                             | 3,2   | μM    | IC50 | HeLa |
| 258. | <chem>COC1=C(O)C(C(=O)\C=C\C2=CC=C(O)C=C2)=C(OC)C(OC)=C1OC</chem>                                                                             | 34,09 | μM    | IC50 | HeLa |
| 259. | <chem>COC1=CC(\C=C\C(=O)C2=C(OC)C(OC)=C(OC)C(OC)=C2O)=CC=C1O</chem>                                                                           | 29,23 | μM    | IC50 | HeLa |
| 260. | <chem>COC1=CC=C(\C=C\C(=O)C2=C(OC)C(OC)=C(OC)C(OC)=C2O)C=C1O</chem>                                                                           | 1,44  | μM    | IC50 | HeLa |
| 261. | <chem>COC1=C(O)C(O)=CC(\C=C\C(=O)C2=C(OC)C(OC)=C(OC)C(OC)=C2O)=C1</chem>                                                                      | 32,95 | μM    | IC50 | HeLa |
| 262. | <chem>COC1=CC(\C=C\C(=O)C2=C(OC)C(OC)=C(OC)C(OC)=C2O)=CC(OC)=C1O</chem><br>C                                                                  | 4,99  | μM    | IC50 | HeLa |
| 263. | <chem>COC1=CC=C(C=C1)C1ON=C2C1SC(N2C1=CC=C(Cl)C=C1)C1=CC(CC2=CC(C3SC4C(ON=C4N3C3=CC=C(Cl)C=C3)C3=CC=C(OC)C=C3)=C(OC)C=C2)=C1</chem><br>C=C1OC | >100  | μg/mL | IC50 | HeLa |
| 264. | <chem>[H]C1CC[C@]2([H])[C@]1([H])CC[C@]1([H])C3=C(CC[C@@]21[H])C=C1OC(=CC(=O)C1=C3)C1=CC=CC=C1</chem>                                         | 3,9   | μM    | IC50 | HeLa |
| 265. | <chem>[H]C1CC[C@]2([H])[C@]1([H])CC[C@]1([H])C3=C(CC[C@@]21[H])C=C1OC(=CC(=O)C1=C3)C1=CC=C(C)C=C1</chem>                                      | 6,3   | μM    | IC50 | HeLa |
| 266. | <chem>[H]C1CC[C@]2([H])[C@]1([H])CC[C@]1([H])C3=C(CC[C@@]21[H])C=C1OC(=CC(=O)C1=C3)C1=CC=C(Br)C=C1</chem>                                     | 6,9   | μM    | IC50 | HeLa |

|      |                                                                                                          |       |    |      |        |
|------|----------------------------------------------------------------------------------------------------------|-------|----|------|--------|
| 267. | <chem>COC1=CC=C(\C=C\C(=O)C2=CC(OC)=C(OC)C(OC)=C2)C=C1OC(=O)CCC(=O)O[Pt]([NH3])([NH3])(O)(Cl)Cl</chem>   | 0,41  | μM | IC50 | HeLa   |
| 268. | <chem>COC1=CC=C(\C=C\C(=O)C2=CC(OC)=C(OC)C(OC)=C2)C=C1OC(=O)CCC(=O)O[Pt]([NH3])([NH3])(Cl)(Cl)Cl</chem>  | 0,5   | μM | IC50 | HeLa   |
| 269. | <chem>COC1=CC=C(\C=C\C(=O)C2=CC(OC)=C(OC)C(OC)=C2)C=C1OC(=O)CCCC(=O)O[Pt]([NH3])([NH3])(O)(Cl)Cl</chem>  | 0,32  | μM | IC50 | HeLa   |
| 270. | <chem>COC1=CC=C(\C=C\C(=O)C2=CC(OC)=C(OC)C(OC)=C2)C=C1OC(=O)CCCC(=O)O[Pt]([NH3])([NH3])(Cl)(Cl)Cl</chem> | 0,43  | μM | IC50 | HeLa   |
| 271. | <chem>COC1=CC(\C=C\C(=O)C2=CC=C(NC(=O)C3=CC=CC=C3CN3C(=O)C4=C(C=CC=C4)C3=O)C=C2)=CC(OC)=C1OC</chem>      | 1,62  | μM | IC50 | Hep G2 |
| 272. | <chem>O=C(NC1=CC=C(C=C1)C(=O)\C=C\C1=CC=CC=C1)C1=CC=CC=C1CC1C(=O)C2=C(C=CC=C2)C1=O</chem>                | 12,93 | μM | IC50 | Hep G2 |
| 273. | <chem>ClC1=CC=C(\C=C\C(=O)C2=CC=C(NC(=O)C3=CC=CC=C3CC3C(=O)C4=C(C=CC=C4)C3=O)C=C2)C=C1</chem>            | 3,21  | μM | IC50 | Hep G2 |
| 274. | <chem>COC1=CC=C(\C=C\C(=O)C2=CC=C(NC(=O)C3=CC=CC=C3CC3C(=O)C4=C(C=CC=C4)C3=O)C=C2)C=C1</chem>            | 1,87  | μM | IC50 | Hep G2 |
| 275. | <chem>O=C(NC1=CC=C(C=C1)C(=O)\C=C\C1=CC=C2C=CC=CC2=C1)C1=CC=CC=C1CC1C(=O)C2=C(C=CC=C2)C1=O</chem>        | 8,07  | μM | IC50 | Hep G2 |
| 276. | <chem>[O-][N+](=O)C1=CC=C(\C=C\C(=O)C2=CC=C(NC(=O)C3=CC=CC=C3CC3C(=O)C4=C(C=CC=C4)C3=O)C=C2)C=C1</chem>  | 8,47  | μM | IC50 | Hep G2 |
| 277. | <chem>COC1=CC=C(\C=C\C(=O)C2=CC=C(NC(=O)C3=CC=CC=C3CC3C(=O)C4=C(C=CC=C4)C3=O)C=C2)C(OC)=C1</chem>        | 15,85 | μM | IC50 | Hep G2 |
| 278. | <chem>O=C(NC1=CC=C(C=C1)C(=O)\C=C\C1=CC=CO1)C1=CC=CC=C1CC1C(=O)C2=C(C=CC=C2)C1=O</chem>                  | 1,75  | μM | IC50 | Hep G2 |
| 279. | <chem>C1C(NN=C1C1=C2C=CC=CC2=CC2=C1C=CC=C2)C1=CC=CC=C1</chem>                                            | 3,86  | μM | IC50 | HepG2  |
| 280. | <chem>ClC1=CC=C(C=C1)C1CC(=NN1)C1=C2C=CC=CC2=CC2=C1C=CC=C2</chem>                                        | 22,22 | μM | IC50 | HepG2  |
| 281. | <chem>FC1=CC=C(C=C1)C1CC(=NN1)C1=C2C=CC=CC2=CC2=C1C=CC=C2</chem>                                         | 3,5   | μM | IC50 | HepG2  |

|      |                                                                                                                       |           |                  |                 |       |
|------|-----------------------------------------------------------------------------------------------------------------------|-----------|------------------|-----------------|-------|
| 282. | <chem>CC1=CC=C(C=C1)C1CC(=NN1)C1=C2C=CC=CC2=CC2=C1C=CC=C2</chem>                                                      | 26,44     | μM               | IC50            | HepG2 |
| 283. | <chem>ClC1=CC(=CC=C1)C1CC(=NN1)C1=C2C=CC=CC2=CC2=C1C=CC=C2</chem>                                                     | 20,88     | μM               | IC50            | HepG2 |
| 284. | [O-]<br><chem>][N+](=O)C1=CC=C(C=C1)C1CC(=NN1)C1=C2C=CC=CC2=CC2=C1C=CC=C2</chem>                                      | 20,65     | μM               | IC50            | HepG2 |
| 285. | <chem>BrC1=CC=C(C=C1)C1CC(=NN1)C1=C2C=CC=CC2=CC2=C1C=CC=C2</chem>                                                     | 19,22     | μM               | IC50            | HepG2 |
| 286. | <chem>FC1=CC(=CC=C1)C1CC(=NN1)C1=C2C=CC=CC2=CC2=C1C=CC=C2</chem>                                                      | 33,44     | μM               | IC50            | HepG2 |
| 287. | [O-]<br><chem>][N+](=O)C1=CC(=CC=C1)C1CC(=NN1)C1=C2C=CC=CC2=CC2=C1C=CC=C2</chem>                                      | 0,22      | μM               | IC50            | HepG2 |
| 288. | <chem>CN(C)C1=CC=C(C=C1)C1CC(=NN1)C1=C2C=CC=CC2=CC2=C1C=CC=C2</chem>                                                  | 1,58      | μM               | IC50            | HepG2 |
| 289. | <chem>C1C(NN=C1C1=C2C=CC=CC2=CC2=C1C=CC=C2)C1=CC=C(C=C1)C1=CC=C</chem><br>O1                                          | 0,44      | μM               | IC50            | HepG2 |
| 290. | <chem>C1C(NN=C1C1=C2C=CC=CC2=CC2=C1C=CC=C2)C1=CC=CO1</chem>                                                           | 0,4       | μM               | IC50            | HepG2 |
| 291. | <chem>COC1=CC(=CC(OC)=C1OC)C1CC(=NN1)C1=C2C=CC=CC2=CC2=C1C=CC=C</chem><br>C2                                          | 0,22      | μM               | IC50            | HepG2 |
| 292. | <chem>COC1=C(OC)C=C(C=C1)C1CC(=NN1)C1=C2C=CC=CC2=CC2=C1C=CC=C2</chem>                                                 | 2,66      | μM               | IC50            | HepG2 |
| 293. | <chem>COC1=CC=C(C=C1)C1CC(=NN1)C1=C2C=CC=CC2=CC2=C1C=CC=C2</chem>                                                     | 3,26      | μM               | IC50            | HepG2 |
| 294. | <chem>C1C(NN=C1C1=C2C=CC=CC2=CC2=C1C=CC=C2)C1=CC=NC=C1</chem>                                                         | 15,23     | μM               | IC50            | HepG2 |
| 295. | <chem>O=C(C1CC2CSCN2C11C(=O)NC2=C1C=CC=C2)C1=CNC2=C1C=CC=C2</chem>                                                    | 5.5 ± 0.2 | μM               | IC50            | HepG2 |
| 296. | [H]C1=C(OC)C([H])=C2C=CC(=[O+])C2=C1[H])C1=CC=C(O)C(OC)=C1                                                            | 70        | %<br>viabilidade | %               | HepG2 |
| 297. | <chem>COC1=CC(OC2=CC(OC)=C(OC)C(OC)=C2)=C(C(/C=C/C3=CC=C(OC)C=C3)=O)C=C1</chem>                                       | 4,64      | μM               | IC50            | HepG2 |
| 298. | <chem>CCOC(=O)CN1C(=O)C2=C(SC3=C2CCN(C3)C(=O)OCC)N=C1SCC(=O)NC1=CC=C(C=C1)C(=O)\C=C/C1=CC=CC=C1Cl</chem>              | 18,5      | %                | % sobrevivência | HepG2 |
| 299. | <chem>CCOC(=O)CN1C(=O)C2=C(SC3=C2CCN(C3)C(=O)OCC)N=C1SCC(=O)NC1=CC=C(C=C1)C(=O)\C=C/C1=CC(OC)=C(OC)C(OC)=C1</chem>    | 12,1      | %                | % sobrevivência | HepG2 |
| 300. | <chem>CCOC(=O)CN1C(=O)C2=C(SC3=C2CCN(C3)C(=O)OCC)N=C1SCC(=O)NC1=CC=C(C=C1)C(=O)\C=C/C1=CC=CC(=C1)[N+][([O-])=O</chem> | 18        | %                | % sobrevivência | HepG2 |

|      |                                                                                                                     |      |    |                 |        |
|------|---------------------------------------------------------------------------------------------------------------------|------|----|-----------------|--------|
| 301. | <chem>CCOCC1=NC2=C(C3=C(CN(CC3)C(=O)OCC)S2)C(=O)N1CC(=O)NC1=CC=C(C=C1)C(=O)\C=C/C1=CC=C(OC)C(OC)=C1OC</chem>        | 18,4 | %  | % sobrevivência | HepG2  |
| 302. | <chem>CCOC(=O)N1CCC2=C(C1)SC1=C2C(=O)NC(SCC(=O)NC2=CC=C(C=C2)C(=O)\C=C/C2=CC(OC)=C(OC)C(OC)=C2)=N1</chem>           | 14,1 | %  | % sobrevivência | HepG2  |
| 303. | <chem>CCOCC1=NC2=C(C3=C(CN(CC3)C(=O)OCC)S2)C(=O)N1CC(=O)NC1=CC=C(C=C1)C(=O)\C=C/C1=CC=CC(=C1)[N+](O-)=O</chem>      | 10,7 | %  | % sobrevivência | HepG2  |
| 304. | <chem>CCOC(=O)CN1C(=O)C2=C(SC3=C2CC(C)(C)NC3(C)C)N=C1SCC(=O)NC1=C(C=C(C=C1)C(=O)\C=C/C1=CC=CC(=C1)[N+](O-)=O</chem> | 12,3 | %  | % sobrevivência | HepG2  |
| 305. | <chem>CC1=CC=C(C=C1)C(=O)\C=C\C1=CC=C(\C=N\NC(N)=N)C=C1</chem>                                                      | 7,17 | μM | IC50            | HepG2  |
| 306. | <chem>COC1=CC=C(\C=C\C(=O)C2=CC(OC)=C(OC)C(OC)=C2)C=C1OC(=O)CCC(=O)O[Pt]([NH3])([NH3])(O)(Cl)Cl</chem>              | 0,33 | μM | IC50            | HepG-2 |
| 307. | <chem>COC1=CC=C(\C=C\C(=O)C2=CC(OC)=C(OC)C(OC)=C2)C=C1OC(=O)CCC(=O)O[Pt]([NH3])([NH3])(Cl)(Cl)Cl</chem>             | 0,41 | μM | IC50            | HepG-2 |
| 308. | <chem>COC1=CC=C(\C=C\C(=O)C2=CC(OC)=C(OC)C(OC)=C2)C=C1OC(=O)CCCC(=O)O[Pt]([NH3])([NH3])(O)(Cl)Cl</chem>             | 0,29 | μM | IC50            | HepG-2 |
| 309. | <chem>COC1=CC=C(\C=C\C(=O)C2=CC(OC)=C(OC)C(OC)=C2)C=C1OC(=O)CCCC(=O)O[Pt]([NH3])([NH3])(Cl)(Cl)Cl</chem>            | 0,35 | μM | IC50            | HepG-2 |
| 310. | <chem>[H]OC1=C(C=CC=C1)C(=O)\C=C\C1=CC=C(OC)C=C1</chem>                                                             | 35,2 | μM | IC50            | HL60   |
| 311. | <chem>COC1=CC=C(\C=C\C(=O)C2=C(OC(=O)C3=CC=CO3)C=CC=C2)C=C1</chem>                                                  | 0,3  | μM | IC50            | HL60   |
| 312. | <chem>[H]N([H])C1=C(C=CC=C1)C(=O)\C=C\C1=CC=C(OC)C=C1</chem>                                                        | 12,4 | μM | IC50            | HL60   |
| 313. | <chem>[H]N(C(=O)C1=CC=CO1)C1=C(C=CC=C1)C(=O)\C=C\C1=CC=C(OC)C=C1</chem>                                             | 0,5  | μM | IC50            | HL60   |
| 314. | <chem>[H]OC1=C(C=CC=C1)C(=O)\C=C\C1=CC(OC)=C(OC)C(OC)=C1</chem>                                                     | 46,6 | μM | IC50            | HL60   |
| 315. | <chem>COC1=CC(\C=C\C(=O)C2=C(OC(=O)C3=CC=CO3)C=CC=C2)=CC(OC)=C1OC</chem>                                            | 23,1 | μM | IC50            | HL60   |
| 316. | <chem>[H]OC1=C(C(=O)\C=C\C2=CC(OC)=C(OC)C(OC)=C2)C(OBr)=CC=C1</chem>                                                | 5,8  | μM | IC50            | HL60   |
| 317. | <chem>COC1=CC(\C=C\C(=O)C2=C(OC(=O)C3=CC=CO3)C=CC=C2OBr)=CC(OC)=C1OC</chem>                                         | 3,6  | μM | IC50            | HL60   |
| 318. | <chem>[H]N([H])C1=C(C=CC=C1)C(=O)\C=C\C1=CC(OC)=C(OC)C(OC)=C1</chem>                                                | 6,3  | μM | IC50            | HL60   |

|      |                                                                                     |       |    |      |            |
|------|-------------------------------------------------------------------------------------|-------|----|------|------------|
| 319. | [H]N(C(=O)C1=CC=CO1)C1=C(C=CC=C1)C(=O)\C=C\C1=CC(OC)=C(OC)C(OC)=C1                  | 26,1  | μM | IC50 | HL60       |
| 320. | [H]OC1=C(C=CC=C1)C(=O)\C=C\C1=CC(OC)=C(OC)C(OC)=C1                                  | >100  | μM | IC50 | HL60       |
| 321. | COC1=CC(\C=C\C(=O)C2=C(OC(=O)C3=CC=CO3)C=CC=C2)=CC(OC)=C1O<br>C                     | 7,8   | μM | IC50 | HL60       |
| 322. | [H]OC1=C(OC2=C(C=CC=C2)C1=O)C1=CC=C(OC)C=C1                                         | 55,9  | μM | IC50 | HL60       |
| 323. | COC1=CC=C(C=C1)C1=C(OC(=O)C2=CC=CO2)C(=O)C2=C(O1)C=CC=C2                            | 33,1  | μM | IC50 | HL60       |
| 324. | COC1=CC(\C=C\C(=O)C2=CC=C3OC(=O)N(CN4CCCCC4)C3=C2)=CC(OC)<br>=C1OC                  | 5,4   | μM | IC50 | HL-60      |
| 325. | COC1=CC(\C=C\C(=O)C2=CC=C3OC(=O)N(CN4CCOCC4)C3=C2)=CC(OC)<br>=C1OC                  | 8,9   | μM | IC50 | HL-60      |
| 326. | COC1=CC(\C=C\C(=O)C2=CC=C3OC(=O)N(CN4CCSCC4)C3=C2)=CC(OC)<br>=C1OC                  | 5,6   | μM | IC50 | HL-60      |
| 327. | COC1=CC(\C=C\C(=O)C2=CC=C3OC(=O)N(CN4CCN(CC5=CC=CC=C5)CC<br>4)C3=C2)=CC(OC)=C1OC    | 7,1   | μM | IC50 | HL-60      |
| 328. | COC1=CC(\C=C\C(=O)C2=CC=C3OC(=O)N(CN4CCN(CC4)C4=C(OC)C=C<br>C=C4)C3=C2)=CC(OC)=C1OC | 20,7  | μM | IC50 | HL-60      |
| 329. | [H]C1=C([H])C(=CC=C1\C=C\C(=C)C1=C(C)N(N=N1)C1=CC=C(Br)C=C1)N<br>(C)C               | 77,05 | μM | IC50 | HL-60 (TB) |
| 330. | [H]C1=C(OC)C(OC)=CC=C1\C=C\C(=C)C1=C(C)N(N=N1)C1=CC=C(Br)C=C<br>1                   | 47,12 | μM | IC50 | HL-60 (TB) |
| 331. | [H]C1=C([H])C(\C=C\C(=O)C2=C(C)N(N=N2)C2=CC=C(Br)C=C2)=CC=C1O<br>C                  | 94,21 | μM | IC50 | HL-60 (TB) |
| 332. | [H]C1=CC=C(\C=C\C(=O)C2=C(C)N(N=N2)C2=CC=C(Br)C=C2)C(OC)=C1[<br>H]                  | 59,81 | μM | IC50 | HL-60 (TB) |
| 333. | [H]C1=CC=C(\C=C\C(=O)C2=C(C)N(N=N2)C2=CC=C(Br)C=C2)C([H])=C1[<br>N+][([O-])=O       | 76,2  | μM | IC50 | HL-60 (TB) |

|      |                                                                                                          |        |    |      |            |
|------|----------------------------------------------------------------------------------------------------------|--------|----|------|------------|
| 334. | <chem>[H]C1=C([H])C(\C=C\C(=O)C2=C(C)N(N=N2)C2=CC=C(Br)C=C2)=CC=C1C1</chem>                              | 105,34 | μM | IC50 | HL-60 (TB) |
| 335. | <chem>[H]C1=C([H])C(=CC=C1\C=C\C(=O)C1=C(C)N(N=N1)C1=CC=C(F)C=C1)N(C)C</chem>                            | 103,92 | μM | IC50 | HL-60 (TB) |
| 336. | <chem>[H]C1=C(OC)C(OC)=CC=C1\C=C\C(=O)C1=C(C)N(N=N1)C1=CC=C(F)C=C1</chem>                                | 58,46  | μM | IC50 | HL-60 (TB) |
| 337. | <chem>[H]C1=C([H])C(\C=C\C(=O)C2=C(C)N(N=N2)C2=CC=C(F)C=C2)=CC=C1OC</chem>                               | 92,94  | μM | IC50 | HL-60 (TB) |
| 338. | <chem>[H]C1=CC=C(\C=C\C(=O)C2=C(C)N(N=N2)C2=CC=C(F)C=C2)C(OC)=C1[H]</chem>                               | 31,92  | μM | IC50 | HL-60 (TB) |
| 339. | <chem>[H]C1=C([H])C(=CC=C1\C=C\C(=O)C1=C(C)N(N=N1)C1=CC=C(C=C1)C(O)=O)N(C)C</chem>                       | 82,93  | μM | IC50 | HL-60 (TB) |
| 340. | <chem>[H]C1=C(OC)C(OC)=CC=C1\C=C\C(=O)C1=C(C)N(N=N1)C1=CC=C(C=C1)C(O)=O</chem>                           | 83,19  | μM | IC50 | HL-60 (TB) |
| 341. | <chem>[H]C1=C([H])C(\C=C\C(=O)C2=C(C)N(N=N2)C2=CC=C(C=C2)C(O)=O)=CC=C1OC</chem>                          | 101,94 | μM | IC50 | HL-60 (TB) |
| 342. | <chem>[H]C1=CC=C(\C=C\C(=O)C2=C(C)N(N=N2)C2=CC=C(C=C2)C(O)=O)C(OC)=C1[H]</chem>                          | 83,2   | μM | IC50 | HL-60 (TB) |
| 343. | <chem>COC1=CC=C(\C=C\C(=O)C2=CC(OC)=C(OC)C(OC)=C2)C=C1OC(=O)CCC(=O)O[Pt]([NH3])([NH3])(O)(Cl)Cl</chem>   | 11,85  | μM | IC50 | HL-7702    |
| 344. | <chem>COC1=CC=C(\C=C\C(=O)C2=CC(OC)=C(OC)C(OC)=C2)C=C1OC(=O)CCC(=O)O[Pt]([NH3])([NH3])(Cl)(Cl)Cl</chem>  | 12,3   | μM | IC50 | HL-7702    |
| 345. | <chem>COC1=CC=C(\C=C\C(=O)C2=CC(OC)=C(OC)C(OC)=C2)C=C1OC(=O)CCCC(=O)O[Pt]([NH3])([NH3])(O)(Cl)Cl</chem>  | 12,35  | μM | IC50 | HL-7702    |
| 346. | <chem>COC1=CC=C(\C=C\C(=O)C2=CC(OC)=C(OC)C(OC)=C2)C=C1OC(=O)CCCC(=O)O[Pt]([NH3])([NH3])(Cl)(Cl)Cl</chem> | 13,08  | μM | IC50 | HL-7702    |
| 347. | <chem>[H]C1=C([H])C(=CC=C1\C=C\C(=C)C1=C(C)N(N=N1)C1=CC=C(Br)C=C1)N(C)C</chem>                           | 103,69 | μM | IC50 | HOP-62     |

|      |                                                                                     |        |    |      |        |
|------|-------------------------------------------------------------------------------------|--------|----|------|--------|
| 348. | <chem>[H]C1=C(OC)C(OC)=CC=C1\C=C\C(=C)C1=C(C)N(N=N1)C1=CC=C(Br)C=C1</chem>          | 88,14  | μM | IC50 | HOP-62 |
| 349. | <chem>[H]C1=C([H])C(\C=C\C(=O)C2=C(C)N(N=N2)C2=CC=C(Br)C=C2)=CC=C1O</chem>          | 95,48  | μM | IC50 | HOP-62 |
| 350. | <chem>[H]C1=CC=C(\C=C\C(=O)C2=C(C)N(N=N2)C2=CC=C(Br)C=C2)C(OC)=C1[H]</chem>         | 113,22 | μM | IC50 | HOP-62 |
| 351. | <chem>[H]C1=CC=C(\C=C\C(=O)C2=C(C)N(N=N2)C2=CC=C(Br)C=C2)C([H])=C1[N+][O-]=O</chem> | 101,35 | μM | IC50 | HOP-62 |
| 352. | <chem>[H]C1=C([H])C(\C=C\C(=O)C2=C(C)N(N=N2)C2=CC=C(Br)C=C2)=CC=C1C1</chem>         | 100,29 | μM | IC50 | HOP-62 |
| 353. | <chem>[H]C1=C([H])C(=CC=C1\C=C\C(=O)C1=C(C)N(N=N1)C1=CC=C(F)C=C1)N(C)C</chem>       | 102,98 | μM | IC50 | HOP-62 |
| 354. | <chem>[H]C1=C(OC)C(OC)=CC=C1\C=C\C(=O)C1=C(C)N(N=N1)C1=CC=C(F)C=C1</chem>           | 103,82 | μM | IC50 | HOP-62 |
| 355. | <chem>[H]C1=C([H])C(\C=C\C(=O)C2=C(C)N(N=N2)C2=CC=C(F)C=C2)=CC=C1O</chem>           | 92,77  | μM | IC50 | HOP-62 |
| 356. | <chem>[H]C1=CC=C(\C=C\C(=O)C2=C(C)N(N=N2)C2=CC=C(F)C=C2)C(OC)=C1[H]</chem>          | 72,16  | μM | IC50 | HOP-62 |
| 357. | <chem>[H]C1=C([H])C(=CC=C1\C=C\C(=O)C1=C(C)N(N=N1)C1=CC=C(C=C1)C(O)=O)N(C)C</chem>  | 93,41  | μM | IC50 | HOP-62 |
| 358. | <chem>[H]C1=C(OC)C(OC)=CC=C1\C=C\C(=O)C1=C(C)N(N=N1)C1=CC=C(C=C1)C(O)=O</chem>      | 107,42 | μM | IC50 | HOP-62 |
| 359. | <chem>[H]C1=C([H])C(\C=C\C(=O)C2=C(C)N(N=N2)C2=CC=C(C=C2)C(O)=O)=CC=C1OC</chem>     | 101,53 | μM | IC50 | HOP-62 |
| 360. | <chem>[H]C1=CC=C(\C=C\C(=O)C2=C(C)N(N=N2)C2=CC=C(C=C2)C(O)=O)C(OC)=C1[H]</chem>     | 110,05 | μM | IC50 | HOP-62 |
| 361. | <chem>[H]C1=C([H])C(=CC=C1\C=C\C(=C)C1=C(C)N(N=N1)C1=CC=C(Br)C=C1)N(C)C</chem>      | 81,67  | μM | IC50 | HOP-92 |

|      |                                                                                     |        |    |      |         |
|------|-------------------------------------------------------------------------------------|--------|----|------|---------|
| 362. | <chem>[H]C1=C(OC)C(OC)=CC=C1\C=C\C(=O)C1=C(C)N(N=N1)C1=CC=C(Br)C=C1</chem>          | 81     | μM | IC50 | HOP-92  |
| 363. | <chem>[H]C1=C([H])C(\C=C\C(=O)C2=C(C)N(N=N2)C2=CC=C(Br)C=C2)=CC=C1O</chem>          | 86,95  | μM | IC50 | HOP-92  |
| 364. | <chem>[H]C1=CC=C(\C=C\C(=O)C2=C(C)N(N=N2)C2=CC=C(Br)C=C2)C(OC)=C1[H]</chem>         | 84,56  | μM | IC50 | HOP-92  |
| 365. | <chem>[H]C1=CC=C(\C=C\C(=O)C2=C(C)N(N=N2)C2=CC=C(Br)C=C2)C([H])=C1[N+][O-]=O</chem> | 95,61  | μM | IC50 | HOP-92  |
| 366. | <chem>[H]C1=C([H])C(\C=C\C(=O)C2=C(C)N(N=N2)C2=CC=C(Br)C=C2)=CC=C1C1</chem>         | 83,96  | μM | IC50 | HOP-92  |
| 367. | <chem>[H]C1=C([H])C(=CC=C1\C=C\C(=O)C1=C(C)N(N=N1)C1=CC=C(F)C=C1)N(C)C</chem>       | 92,33  | μM | IC50 | HOP-92  |
| 368. | <chem>[H]C1=C(OC)C(OC)=CC=C1\C=C\C(=O)C1=C(C)N(N=N1)C1=CC=C(F)C=C1</chem>           | 98,54  | μM | IC50 | HOP-92  |
| 369. | <chem>[H]C1=C([H])C(\C=C\C(=O)C2=C(C)N(N=N2)C2=CC=C(F)C=C2)=CC=C1O</chem>           | 72,9   | μM | IC50 | HOP-92  |
| 370. | <chem>[H]C1=CC=C(\C=C\C(=O)C2=C(C)N(N=N2)C2=CC=C(F)C=C2)C(OC)=C1[H]</chem>          | 91,08  | μM | IC50 | HOP-92  |
| 371. | <chem>[H]C1=C([H])C(=CC=C1\C=C\C(=O)C1=C(C)N(N=N1)C1=CC=C(C=C1)C(O)=O)N(C)C</chem>  | 101,5  | μM | IC50 | HOP-92  |
| 372. | <chem>[H]C1=C(OC)C(OC)=CC=C1\C=C\C(=O)C1=C(C)N(N=N1)C1=CC=C(C=C1)C(O)=O</chem>      | 94,7   | μM | IC50 | HOP-92  |
| 373. | <chem>[H]C1=C([H])C(\C=C\C(=O)C2=C(C)N(N=N2)C2=CC=C(C=C2)C(O)=O)=CC=C1OC</chem>     | 101,29 | μM | IC50 | HOP-92  |
| 374. | <chem>[H]C1=CC=C(\C=C\C(=O)C2=C(C)N(N=N2)C2=CC=C(C=C2)C(O)=O)C(OC)=C1[H]</chem>     | 92,33  | μM | IC50 | HOP-92  |
| 375. | <chem>COC1=CC(OC)=C(C=C1S(N)(=O)=O)C(=O)\C=C\C1=CC=C(Cl)C=C1</chem>                 | 1,46   | μM | IC50 | HOP-92  |
| 376. | <chem>COC1=CC(OC)=C(C=C1)C(=O)\C=C\C1=CC(OC)=C(OC)C(OC)=C1</chem>                   | 10,8   | μM | IC50 | HT-1376 |



|      |                                                                                                                           |       |       |      |        |
|------|---------------------------------------------------------------------------------------------------------------------------|-------|-------|------|--------|
| 377. | <chem>CC(C)CC1=CC=C(C=C1)C1=NC2=C(SC(C1)C1=CC=CN1)C=CC=C2</chem>                                                          | 16    | µg/mL | IC50 | HT-29  |
| 378. | <chem>CC(C)CC1=CC=C(C=C1)C1=NC2=C(SC(C1)C1=CC=CS1)C=CC=C2</chem>                                                          | 18    | µg/mL | IC50 | HT-29  |
| 379. | <chem>CC(C)CC1=CC=C(C=C1)C1=NC2=C(SC(C1)C1=CC=C(Br)O1)C=CC=C2</chem>                                                      | 2     | µg/mL | IC50 | HT-29  |
| 380. | <chem>[H]C1=CC(\C=C\C(=O)C2=CC=C(C=C2)N2C=C(CN3CCN(CC3)C3=CC4=C(C=C3F)C(=O)C(=CN4C3CC3)C(O)=O)N=N2)=CC([H])=C1[H]</chem>  | 22,35 | µM    | IC50 | HT-29  |
| 381. | <chem>[H]C1=C([H])C(Cl)=CC(\C=C\C(=O)C2=CC=C(C=C2)N2C=C(CN3CCN(CC3)C3=CC4=C(C=C3F)C(=O)C(=CN4C3CC3)C(O)=O)N=N2)=C1</chem> | 42,91 | µM    | IC50 | HT-29  |
| 382. | <chem>[H]C1=CC(\C=C\C(=O)C2=CC=C(C=C2)N2C=C(CN3CCN(CC3)C3=CC4=C(C=C3F)C(=O)C(=CN4C3CC3)C(O)=O)N=N2)=CC([H])=C1F</chem>    | 8,67  | µM    | IC50 | HT-29  |
| 383. | <chem>[H]C1=C(OC)C(OC)=CC(\C=C\C(=O)C2=CC=C(C=C2)N2C=C(CN3CCN(CC3)C3=CC4=C(C=C3F)C(=O)C(=CN4C3CC3)C(O)=O)N=N2)=C1</chem>  | 18,6  | µM    | IC50 | HT-29  |
| 384. | <chem>COC1=CC(\C=C\C(=O)C2=CC=C(C=C2)N2C=C(CN3CCN(CC3)C3=CC4=C(C=C3F)C(=O)C(=CN4C3CC3)C(O)=O)N=N2)=CC(OC)=C1OC</chem>     | 13,24 | µM    | IC50 | HT-29  |
| 385. | <chem>CC1=NC(C)=C(C)N=C1\C=C\C(=O)C1=CC=CO1</chem>                                                                        | 9,58  | µM    | IC50 | HT-29  |
| 386. | <chem>COC1=CC=C2OC(=CC2=C1)C(=O)\C=C\C1=C(C)N=C(C)C(C)=N1</chem>                                                          | 8,18  | µM    | IC50 | HT-29  |
| 387. | <chem>CC1=CSC(=C1)C1=CC=C(C=C1)C(=O)\C=C\C1=NC(C)=C(C)N=C1C</chem>                                                        | 6,54  | µM    | IC50 | HT-29  |
| 388. | <chem>CN(C)C1=CC=C(\C=C\C(=O)C2=C(C)NC(=O)NC2C2=C3OC(=O)C=C(O)C3=CC=C2)C=C1</chem>                                        | 65,56 | µg/mL | IC50 | jurkat |
| 389. | <chem>CON1C=C(C(=O)\C=C\C2=C(OC)C=C(OC)C=C2OC)C2=CC=CC=C12</chem>                                                         | < 7   | µM    | IC50 | Jurkat |
| 390. | <chem>COC1=CC=C(\C=C\C(=O)C2=C(C)N(N=N2)C2=CC=C(Cl)C=C2)C=C1OC</chem>                                                     | 0,84  | µM    | IC50 | K-562  |
| 391. | <chem>[H]C1=C(OC)C(OC)=CC=C1\C=C\C(=C)C1=C(C)N(N=N1)C1=CC=C(Br)C=C1</chem>                                                | 82,02 | µM    | IC50 | K-562  |
| 392. | <chem>[H]C1=C([H])C(\C=C\C(=O)C2=C(C)N(N=N2)C2=CC=C(Br)C=C2)=CC=C1OC</chem>                                               | 19,15 | µM    | IC50 | K-562  |
| 393. | <chem>[H]C1=CC=C(\C=C\C(=O)C2=C(C)N(N=N2)C2=CC=C(Br)C=C2)C(OC)=C1[H]</chem>                                               | 90,22 | µM    | IC50 | K-562  |
| 394. | <chem>[H]C1=CC=C(\C=C\C(=O)C2=C(C)N(N=N2)C2=CC=C(Br)C=C2)C([H])=C1[N+][O-]</chem>                                         | 74,8  | µM    | IC50 | K-562  |

|      |                                                                                           |        |    |      |       |
|------|-------------------------------------------------------------------------------------------|--------|----|------|-------|
| 395. | <chem>[H]C1=C([H])C(\C=C\C(=O)C2=C(C)N(N=N2)C2=CC=C(Br)C=C2)=CC=C1C1</chem>               | 75,55  | μM | IC50 | K-562 |
| 396. | <chem>[H]C1=C([H])C(=CC=C1\C=C\C(=O)C1=C(C)N(N=N1)C1=CC=C(F)C=C1)N(C)C</chem>             | 96,59  | μM | IC50 | K-562 |
| 397. | <chem>[H]C1=C(OC)C(OC)=CC=C1\C=C\C(=O)C1=C(C)N(N=N1)C1=CC=C(F)C=C1</chem>                 | 101,69 | μM | IC50 | K-562 |
| 398. | <chem>[H]C1=C([H])C(\C=C\C(=O)C2=C(C)N(N=N2)C2=CC=C(F)C=C2)=CC=C1OC</chem>                | 50,65  | μM | IC50 | K-562 |
| 399. | <chem>[H]C1=CC=C(\C=C\C(=O)C2=C(C)N(N=N2)C2=CC=C(F)C=C2)C(OC)=C1[H]</chem>                | 97,28  | μM | IC50 | K-562 |
| 400. | <chem>[H]C1=C([H])C(=CC=C1\C=C\C(=O)C1=C(C)N(N=N1)C1=CC=C(C=C1)C(O)=O)N(C)C</chem>        | 8,81   | μM | IC50 | K-562 |
| 401. | <chem>[H]C1=C(OC)C(OC)=CC=C1\C=C\C(=O)C1=C(C)N(N=N1)C1=CC=C(C=C1)C(O)=O</chem>            | 98,48  | μM | IC50 | K-562 |
| 402. | <chem>[H]C1=C([H])C(\C=C\C(=O)C2=C(C)N(N=N2)C2=CC=C(C=C2)C(O)=O)=CC=C1OC</chem>           | 80,83  | μM | IC50 | K-562 |
| 403. | <chem>[H]C1=CC=C(\C=C\C(=O)C2=C(C)N(N=N2)C2=CC=C(C=C2)C(O)=O)C(OC)=C1[H]</chem>           | 88,58  | μM | IC50 | K-562 |
| 404. | <chem>FC(F)(F)C1=CC=C(C=C1)C1C2CSCN2C2(C1C(=O)C1=CNC3=C1C=CC=C3)C(=O)NC1=C2C=CC=C1</chem> | 0,622  | μM | GI50 | K-562 |
| 405. | <chem>COC1=CC(\C=C\C(=O)C2=CC=C3OC(=O)N(CN4CCCCC4)C3=C2)=CC(OC)=C1OC</chem>               | 10,7   | μM | IC50 | K-562 |
| 406. | <chem>COC1=CC(\C=C\C(=O)C2=CC=C3OC(=O)N(CN4CCOCC4)C3=C2)=CC(OC)=C1OC</chem>               | 9,7    | μM | IC50 | K-562 |
| 407. | <chem>COC1=CC(\C=C\C(=O)C2=CC=C3OC(=O)N(CN4CCSCC4)C3=C2)=CC(OC)=C1OC</chem>               | 7,1    | μM | IC50 | K-562 |
| 408. | <chem>COC1=CC(\C=C\C(=O)C2=CC=C3OC(=O)N(CN4CCN(CC5=CC=CC=C5)CC4)C3=C2)=CC(OC)=C1OC</chem> | 10,7   | μM | IC50 | K-562 |

|      |                                                                                                   |       |    |      |                  |
|------|---------------------------------------------------------------------------------------------------|-------|----|------|------------------|
| 409. | <chem>COC1=CC(\C=C\C(=O)C2=CC=C3OC(=O)N(CN4CCN(CC4)C4=C(OC)C=C<br/>C=C4)C3=C2)=CC(OC)=C1OC</chem> | 8,9   | μM | IC50 | K-562            |
| 410. | <chem>COC1=CC(OC)=C(C=C1S(N)(=O)=O)C(=O)\C=C\C1=CC=CC=C1</chem>                                   | 1,5   | μM | IC50 | K-562            |
| 411. | <chem>CCCCN1C(=O)C(\C=C\C(=O)\C=C\C2=CC3=C(C=CC=C3)N(CCCC)C2=O)<br/>=CC2=C1C=CC=C2</chem>         | 0,88  | μM | GI50 | K-562            |
| 412. | <chem>COC1=CC=C(\C=C\C(=O)C2=C(C)N(N=N2)C2=CC=C(Cl)C=C2)C=C1OC</chem>                             | 0,96  | μM | IC50 | Leucemia -<br>SR |
| 413. | <chem>[H]C1=C([H])C(=CC=C1\C=C\C(=C)C1=C(C)N(N=N1)C1=CC=C(Br)C=C1)N<br/>(C)C</chem>               | 95,35 | μM | IC50 | Leucemia -<br>SR |
| 414. | <chem>[H]C1=C(OC)C(OC)=CC=C1\C=C\C(=C)C1=C(C)N(N=N1)C1=CC=C(Br)C=C<br/>1</chem>                   | 66,41 | μM | IC50 | Leucemia -<br>SR |
| 415. | <chem>[H]C1=C([H])C(\C=C\C(=O)C2=C(C)N(N=N2)C2=CC=C(Br)C=C2)=CC=C1O<br/>C</chem>                  | 99,13 | μM | IC50 | Leucemia -<br>SR |
| 416. | <chem>[H]C1=CC=C(\C=C\C(=O)C2=C(C)N(N=N2)C2=CC=C(Br)C=C2)C(OC)=C1[<br/>H]</chem>                  | 83,82 | μM | IC50 | Leucemia -<br>SR |
| 417. | <chem>[H]C1=CC=C(\C=C\C(=O)C2=C(C)N(N=N2)C2=CC=C(Br)C=C2)C([H])=C1[<br/>N+][O-]=O</chem>          | 88,77 | μM | IC50 | Leucemia -<br>SR |
| 418. | <chem>[H]C1=C([H])C(\C=C\C(=O)C2=C(C)N(N=N2)C2=CC=C(Br)C=C2)=CC=C1C<br/>1</chem>                  | 98,56 | μM | IC50 | Leucemia -<br>SR |
| 419. | <chem>[H]C1=C([H])C(=CC=C1\C=C\C(=O)C1=C(C)N(N=N1)C1=CC=C(F)C=C1)N(<br/>C)C</chem>                | 95,77 | μM | IC50 | Leucemia -<br>SR |
| 420. | <chem>[H]C1=C(OC)C(OC)=CC=C1\C=C\C(=O)C1=C(C)N(N=N1)C1=CC=C(F)C=C<br/>1</chem>                    | 79,61 | μM | IC50 | Leucemia -<br>SR |
| 421. | <chem>[H]C1=C([H])C(\C=C\C(=O)C2=C(C)N(N=N2)C2=CC=C(F)C=C2)=CC=C1O<br/>C</chem>                   | 99,2  | μM | IC50 | Leucemia -<br>SR |
| 422. | <chem>[H]C1=CC=C(\C=C\C(=O)C2=C(C)N(N=N2)C2=CC=C(F)C=C2)C(OC)=C1[H<br/>]</chem>                   | 14,01 | μM | IC50 | Leucemia -<br>SR |

|      |                                                                                                         |       |       |      |               |
|------|---------------------------------------------------------------------------------------------------------|-------|-------|------|---------------|
| 423. | <chem>[H]C1=C([H])C(=CC=C1\C=C\C(=O)C1=C(C)N(N=N1)C1=CC=C(C=C1)C(O)=O)N(C)C</chem>                      | 97,44 | μM    | IC50 | Leucemia - SR |
| 424. | <chem>[H]C1=C(OC)C(OC)=CC=C1\C=C\C(=O)C1=C(C)N(N=N1)C1=CC=C(C=C1)C(O)=O</chem>                          | 87,73 | μM    | IC50 | Leucemia - SR |
| 425. | <chem>[H]C1=C([H])C(\C=C\C(=O)C2=C(C)N(N=N2)C2=CC=C(C=C2)C(O)=O)=CC=C1OC</chem>                         | 96,29 | μM    | IC50 | Leucemia - SR |
| 426. | <chem>[H]C1=CC=C(\C=C\C(=O)C2=C(C)N(N=N2)C2=CC=C(C=C2)C(O)=O)C(OC)=C1[H]</chem>                         | 63,92 | μM    | IC50 | Leucemia - SR |
| 427. | <chem>COC1=CC(OC)=C(C=C1S(N)(=O)=O)C(=O)\C=C\C1=CC=C(C)C=C1</chem>                                      | 0,54  | μM    | IC50 | LOX IMVI      |
| 428. | <chem>O=C(NC1=CC=C(C=C1)C(=O)\C=C\C1=CC=CC=C1)C1=CC=CC=C1CC1C(=O)C2=C(C=CC=C2)C1=O</chem>               | 14,43 | μM    | IC50 | MCF -7        |
| 429. | <chem>C1C1=CC=C(\C=C\C(=O)C2=CC=C(NC(=O)C3=CC=CC=C3CC3C(=O)C4=C(C=CC=C4)C3=O)C=C2)C=C1</chem>           | 4,11  | μM    | IC50 | MCF -7        |
| 430. | <chem>COC1=CC=C(\C=C\C(=O)C2=CC=C(NC(=O)C3=CC=CC=C3CC3C(=O)C4=C(C=CC=C4)C3=O)C=C2)C=C1</chem>           | 2,41  | μM    | IC50 | MCF -7        |
| 431. | <chem>O=C(NC1=CC=C(C=C1)C(=O)\C=C\C1=CC=C2C=CC=CC2=C1)C1=CC=CC=C1CC1C(=O)C2=C(C=CC=C2)C1=O</chem>       | 11,31 | μM    | IC50 | MCF -7        |
| 432. | <chem>[O-][N+](=O)C1=CC=C(\C=C\C(=O)C2=CC=C(NC(=O)C3=CC=CC=C3CC3C(=O)C4=C(C=CC=C4)C3=O)C=C2)C=C1</chem> | 5,28  | μM    | IC50 | MCF -7        |
| 433. | <chem>COC1=CC=C(\C=C\C(=O)C2=CC=C(NC(=O)C3=CC=CC=C3CC3C(=O)C4=C(C=CC=C4)C3=O)C=C2)C(OC)=C1</chem>       | 9,78  | μM    | IC50 | MCF -7        |
| 434. | <chem>O=C(NC1=CC=C(C=C1)C(=O)\C=C\C1=CC=CO1)C1=CC=CC=C1CC1C(=O)C2=C(C=CC=C2)C1=O</chem>                 | 2,09  | μM    | IC50 | MCF -7        |
| 435. | <chem>COC1=CC=C(C=C1)C1=CC2=CC=CC=C2N=C1\C=C\C(=O)C1=CC(OC)=C(O)C(OC)=C1</chem>                         | 1,05  | μM    | IC50 | MCF-7         |
| 436. | <chem>CC(C)CC1=CC=C(C=C1)C1=NC2=C(SC(C1)C1=CC=CN1)C=CC=C2</chem>                                        | 15    | μg/mL | IC50 | MCF-7         |
| 437. | <chem>CC(C)CC1=CC=C(C=C1)C1=NC2=C(SC(C1)C1=CC=CS1)C=CC=C2</chem>                                        | 13    | μg/mL | IC50 | MCF-7         |

|      |                                                                                                                                          |       |       |                 |       |
|------|------------------------------------------------------------------------------------------------------------------------------------------|-------|-------|-----------------|-------|
| 438. | <chem>CC(C)CC1=CC=C(C=C1)C1=NC2=C(SC(C1)C1=CC=C(Br)O1)C=CC=C2</chem>                                                                     | 2     | µg/mL | IC50            | MCF-7 |
| 439. | <chem>COC1=CC(OC)=C(C=C1)C(=O)\C=C\C1=CC(OC)=C(OC)C(OC)=C1</chem>                                                                        | 21,1  | µM    | IC50            | MCF-7 |
| 440. | <chem>ClC1=CC(Cl)=C(C=C1)C(=O)\C=C\C1=CC=CS1</chem>                                                                                      | 7,4   | µM    | IC50            | MCF-7 |
| 441. | <chem>COC1=CC=C(C=C1)C1ON=C2C1SC(N2C1=CC=C(Cl)C=C1)C1=CC(CC2=CC(C3SC4C(ON=C4N3C3=CC=C(Cl)C=C3)C3=CC=C(OC)C=C3)=C(OC)C=C2)=CC=C1OC</chem> | 55,16 | µg/mL | IC50            | MCF-7 |
| 442. | <chem>COC1=CC(OC2=CC(OC)=C(OC)C(OC)=C2)=C(C(/C=C/C3=CC=C(OC)C=C3)=O)C=C1</chem>                                                          | 3,44  | µM    | IC50            | MCF-7 |
| 443. | <chem>CCOC(=O)CN1C(=O)C2=C(SC3=C2CCN(C3)C(=O)OCC)N=C1SCC(=O)NC1=CC=C(C=C1)C(=O)\C=C/C1=CC=CC=C1Cl</chem>                                 | 6     | %     | % sobrevivência | MCF-7 |
| 444. | <chem>CCOC(=O)CN1C(=O)C2=C(SC3=C2CCN(C3)C(=O)OCC)N=C1SCC(=O)NC1=CC=C(C=C1)C(=O)\C=C/C1=CC(OC)=C(OC)C(OC)=C1</chem>                       | 17,3  | %     | % sobrevivência | MCF-7 |
| 445. | <chem>CCOC(=O)CN1C(=O)C2=C(SC3=C2CCN(C3)C(=O)OCC)N=C1SCC(=O)NC1=CC=C(C=C1)C(=O)\C=C/C1=CC=CC(=C1)[N+](O-)=O</chem>                       | 5,9   | %     | % sobrevivência | MCF-7 |
| 446. | <chem>CCOCC1=NC2=C(C3=C(CN(CC3)C(=O)OCC)S2)C(=O)N1CC(=O)NC1=CC=C(C=C1)C(=O)\C=C/C1=CC=C(OC)C(OC)=C1OC</chem>                             | 5,8   | %     | % sobrevivência | MCF-7 |
| 447. | <chem>CCOC(=O)N1CCC2=C(C1)SC1=C2C(=O)NC(SCC(=O)NC2=CC=C(C=C2)C(=O)\C=C/C2=CC(OC)=C(OC)C(OC)=C2)=N1</chem>                                | 15,9  | %     | % sobrevivência | MCF-7 |
| 448. | <chem>CCOCC1=NC2=C(C3=C(CN(CC3)C(=O)OCC)S2)C(=O)N1CC(=O)NC1=CC=C(C=C1)C(=O)\C=C/C1=CC=CC(=C1)[N+](O-)=O</chem>                           | 4,6   | %     | % sobrevivência | MCF-7 |
| 449. | <chem>CCOC(=O)CN1C(=O)C2=C(SC3=C2CC(C)(C)NC3(C)C)N=C1SCC(=O)NC1=C(C=C(C=C1)C(=O)\C=C/C1=CC=CC(=C1)[N+](O-)=O</chem>                      | 15,3  | %     | % sobrevivência | MCF-7 |
| 450. | <chem>COC1=CC(O)=C(\C=C\C(=O)C2=CC=C3C=CC=CC3=C2)C(Br)=C1</chem>                                                                         | 6,5   | µM    | IC50            | MCF-7 |
| 451. | <chem>[H]C1CC[C@]2([H])[C@]1([H])CC[C@]1([H])C3=C(CC[C@@]21[H])C=C1OC(=CC(=O)C1=C3)C1=CC=CC=C1</chem>                                    | 5,6   | µM    | IC50            | MCF-7 |
| 452. | <chem>[H]C1CC[C@]2([H])[C@]1([H])CC[C@]1([H])C3=C(CC[C@@]21[H])C=C1OC(=CC(=O)C1=C3)C1=CC=C(C)C=C1</chem>                                 | 8     | µM    | IC50            | MCF-7 |

|      |                                                                                                           |              |    |                        |       |
|------|-----------------------------------------------------------------------------------------------------------|--------------|----|------------------------|-------|
| 453. | <chem>[H]C1CC[C@]2([H])[C@]1([H])CC[C@]1([H])C3=C(CC[C@@]21[H])C=C1OC(=CC(=O)C1=C3)C1=CC=C(Br)C=C1</chem> | 7,8          | μM | IC50                   | MCF-7 |
| 454. | <chem>CON1C=C(C(=O)\C=C\C2=C(OC)C=C(OC)C=C2OC)C2=CC=CC=C12</chem>                                         | < 7          | μM | IC50                   | MCF-7 |
| 455. | <chem>CC1=NC(C)=C(C)N=C1\C=C\C(=O)C1=CC=CO1</chem>                                                        | 5,07         | μM | IC50                   | MCF-7 |
| 456. | <chem>COC1=CC=C2OC(=CC2=C1)C(=O)\C=C\C1=C(C)N=C(C)C(C)=N1</chem>                                          | 7,81         | μM | IC50                   | MCF-7 |
| 457. | <chem>CC1=CSC(=C1)C1=CC=C(C=C1)C(=O)\C=C\C1=NC(C)=C(C)N=C1C</chem>                                        | 9,27         | μM | IC50                   | MCF-7 |
| 458. | <chem>COC1=C(C=CC=C1)C(=O)\C=C\C1=CC=C(C=C1)[N+](=[O-])=O</chem>                                          | 1,33         | μM | GI50                   | MCF-7 |
| 459. | <chem>NC1CCCCC1CC1=CC(\C=C\C(=O)C2=CC=C(CC3=CC(=NC4=CC=CC=C34)C(F)(F)F)C=C2)=CC=C1</chem>                 | 0,5          | μM | GI50                   | MCF-7 |
| 460. | <chem>COC1=CC(OC)=C(C(=O)\C=C\C2=CC=C(C=C2)N2CCNCC2)C(O)=C1</chem>                                        | 3.08 a 16.13 | %  | percentual de inibição | MC-F7 |
| 461. | <chem>COC1=C(C(=O)\C=C\C2=CC=CC=C2)C(O)=C(C)C(O)=C1C</chem>                                               | 24           | μM | IC50                   | MC-F7 |
| 462. | <chem>C1C(NN=C1C1=C2C=CC=CC2=CC2=C1C=CC=C2)C1=CC=CC=C1</chem>                                             | 0,73         | μM | IC50                   | MC-F7 |
| 463. | <chem>C1C1=CC=C(C=C1)C1CC(=NN1)C1=C2C=CC=CC2=CC2=C1C=CC=C2</chem>                                         | 0,495        | μM | IC50                   | MC-F7 |
| 464. | <chem>FC1=CC=C(C=C1)C1CC(=NN1)C1=C2C=CC=CC2=CC2=C1C=CC=C2</chem>                                          | 3,08         | μM | IC50                   | MC-F7 |
| 465. | <chem>CC1=CC=C(C=C1)C1CC(=NN1)C1=C2C=CC=CC2=CC2=C1C=CC=C2</chem>                                          | 0,493        | μM | IC50                   | MC-F7 |
| 466. | <chem>C1C1=CC(=CC=C1)C1CC(=NN1)C1=C2C=CC=CC2=CC2=C1C=CC=C2</chem>                                         | 0,66         | μM | IC50                   | MC-F7 |
| 467. | <chem>[O-][N+](=O)C1=CC=C(C=C1)C1CC(=NN1)C1=C2C=CC=CC2=CC2=C1C=CC=C2</chem>                               | 1,5          | μM | IC50                   | MC-F7 |
| 468. | <chem>BrC1=CC=C(C=C1)C1CC(=NN1)C1=C2C=CC=CC2=CC2=C1C=CC=C2</chem>                                         | 1,5          | μM | IC50                   | MC-F7 |
| 469. | <chem>FC1=CC(=CC=C1)C1CC(=NN1)C1=C2C=CC=CC2=CC2=C1C=CC=C2</chem>                                          | 2            | μM | IC50                   | MC-F7 |
| 470. | <chem>[O-][N+](=O)C1=CC(=CC=C1)C1CC(=NN1)C1=C2C=CC=CC2=CC2=C1C=CC=C2</chem>                               | 26           | μM | IC50                   | MC-F7 |
| 471. | <chem>CN(C)C1=CC=C(C=C1)C1CC(=NN1)C1=C2C=CC=CC2=CC2=C1C=CC=C2</chem>                                      | 17           | μM | IC50                   | MC-F7 |
| 472. | <chem>C1C(NN=C1C1=C2C=CC=CC2=CC2=C1C=CC=C2)C1=CC=C(C=C1)C1=CC=C1O1</chem>                                 | 1,98         | μM | IC50                   | MC-F7 |
| 473. | <chem>C1C(NN=C1C1=C2C=CC=CC2=CC2=C1C=CC=C2)C1=CC=CO1</chem>                                               | 23           | μM | IC50                   | MC-F7 |

|      |                                                                                                     |              |    |                        |            |
|------|-----------------------------------------------------------------------------------------------------|--------------|----|------------------------|------------|
| 474. | <chem>COC1=CC(=CC(OC)=C1OC)C1CC(=NN1)C1=C2C=CC=CC2=CC2=C1C=CC=C2</chem>                             | 29           | μM | IC50                   | MC-F7      |
| 475. | <chem>COC1=C(OC)C=C(C=C1)C1CC(=NN1)C1=C2C=CC=CC2=CC2=C1C=CC=C2</chem>                               | 25           | μM | IC50                   | MC-F7      |
| 476. | <chem>COC1=CC=C(C=C1)C1CC(=NN1)C1=C2C=CC=CC2=CC2=C1C=CC=C2</chem>                                   | 2,5          | μM | IC50                   | MC-F7      |
| 477. | <chem>C1C(NN=C1C1=C2C=CC=CC2=CC2=C1C=CC=C2)C1=CC=NC=C1</chem>                                       | 50           | μM | IC50                   | MC-F7      |
| 478. | <chem>COC1=CC(OC)=C(C=C1S(N)(=O)=O)C(=O)\C=C\C1=CC=CC=C1</chem>                                     | 0,34         | μM | IC50                   | MCF7       |
| 479. | <chem>COC1=CC(\C=C\C(=O)C2=CC=C(NC(=O)C3=CC=CC=C3CN3C(=O)C4=C(C=CC=C4)C3=O)C=C2)=CC(OC)=C1OC</chem> | 1,88         | μM | IC50                   | MCF-7      |
| 480. | <chem>COC1=CC(\C=C\C(=O)C2=CC=C3OC(=O)N(CN4CCCCC4)C3=C2)=CC(OC)=C1OC</chem>                         | 14,6         | μM | IC50                   | MDA-B-231  |
| 481. | <chem>COC1=CC(\C=C\C(=O)C2=CC=C3OC(=O)N(CN4CCOCC4)C3=C2)=CC(OC)=C1OC</chem>                         | 19,6         | μM | IC50                   | MDA-B-231  |
| 482. | <chem>COC1=CC(\C=C\C(=O)C2=CC=C3OC(=O)N(CN4CCSCC4)C3=C2)=CC(OC)=C1OC</chem>                         | 7,4          | μM | IC50                   | MDA-B-231  |
| 483. | <chem>COC1=CC(\C=C\C(=O)C2=CC=C3OC(=O)N(CN4CCN(CC5=CC=CC=C5)CC4)C3=C2)=CC(OC)=C1OC</chem>           | 12,7         | μM | IC50                   | MDA-B-231  |
| 484. | <chem>COC1=CC(\C=C\C(=O)C2=CC=C3OC(=O)N(CN4CCN(CC4)C4=C(OC)C=C(C=C4)C3=C2)=CC(OC)=C1OC</chem>       | 10,7         | μM | IC50                   | MDA-B-231  |
| 485. | <chem>COC1=CC(OC)=C(C(=O)\C=C\C2=CC=C(C=C2)N2CCNCC2)C(=O)=C1</chem>                                 | 4.99 a 35.58 | %  | percentual de inibição | MDA-MB-231 |
| 486. | <chem>CCOC1=CC=C(C=C1)C(=O)\C=C\C1=CC=C(C=C1)N(O)O</chem>                                           | 53,47        | μM | IC50                   | MDA-MB-231 |
| 487. | <chem>CCOC1=CC=C(C=C1)C(=O)\C=C\C1=CC=C(Cl)C=C1</chem>                                              | 62,42        | μM | IC50                   | MDA-MB-231 |
| 488. | <chem>CCOC1=CC=C(C=C1)C(=O)\C=C\C1=CC=C(Br)C=C1</chem>                                              | 54,04        | μM | IC50                   | MDA-MB-231 |
| 489. | <chem>CCOC1=CC=C(C=C1)C(=O)\C=C\C1=CC=C(OC)C=C1</chem>                                              | 55.96 e      | μM | IC50                   | MDA-MB-231 |

|      |                                                                                                          |        |    |      |             |
|------|----------------------------------------------------------------------------------------------------------|--------|----|------|-------------|
| 490. | <chem>CCOC1=CC=C(C=C1)C(=O)\C=C\C1=CC=C(OC)C(OC)=C1</chem>                                               | 57,3   | μM | IC50 | MDA-MB-231  |
| 491. | <chem>COC1=CC=C(C=C1)C1=CC2=CC=CC=C2N=C1\C=C\C(=O)C1=CC(OC)=C(OC)C(OC)=C1</chem>                         | 0,75   | μM | IC50 | MDA-MDB-231 |
| 492. | <chem>COC1=CC(OC)=C(C=C1S(N)(=O)=O)C(=O)\C=C\C1=CC=CC=C1</chem>                                          | 0,34   | μM | IC50 | MDA-MB-468  |
| 493. | <chem>COC1=CC(OC)=C(C=C1S(N)(=O)=O)C(=O)\C=C\C1=CC=C(C)C=C1</chem>                                       | 1,96   | μM | IC50 | MDA-MB-468  |
| 494. | <chem>COC1=CC=C(\C=C\C(=O)C2=CC(OC)=C(OC)C(OC)=C2)C=C1OC(=O)CCC(=O)O[Pt]([NH3])([NH3])(O)(Cl)Cl</chem>   | 0,3    | μM | IC50 | MGC-803     |
| 495. | <chem>COC1=CC=C(\C=C\C(=O)C2=CC(OC)=C(OC)C(OC)=C2)C=C1OC(=O)CCC(=O)O[Pt]([NH3])([NH3])(Cl)(Cl)Cl</chem>  | 0,45   | μM | IC50 | MGC-803     |
| 496. | <chem>COC1=CC=C(\C=C\C(=O)C2=CC(OC)=C(OC)C(OC)=C2)C=C1OC(=O)CCCC(=O)O[Pt]([NH3])([NH3])(O)(Cl)Cl</chem>  | 0,26   | μM | IC50 | MGC-803     |
| 497. | <chem>COC1=CC=C(\C=C\C(=O)C2=CC(OC)=C(OC)C(OC)=C2)C=C1OC(=O)CCCC(=O)O[Pt]([NH3])([NH3])(Cl)(Cl)Cl</chem> | 0,39   | μM | IC50 | MGC-803     |
| 498. | <chem>[H]C1=C(OC)C(OC)=CC=C1\C=C\C(=C)C1=C(C)N(N=N1)C1=CC=C(Br)C=C1</chem>                               | 96,87  | μM | IC50 | MOLT-4      |
| 499. | <chem>[H]C1=C([H])C(\C=C\C(=O)C2=C(C)N(N=N2)C2=CC=C(Br)C=C2)=CC=C1OC</chem>                              | 78,38  | μM | IC50 | MOLT-4      |
| 500. | <chem>[H]C1=CC=C(\C=C\C(=O)C2=C(C)N(N=N2)C2=CC=C(Br)C=C2)C(OC)=C1[H]</chem>                              | 101,85 | μM | IC50 | MOLT-4      |
| 501. | <chem>[H]C1=CC=C(\C=C\C(=O)C2=C(C)N(N=N2)C2=CC=C(Br)C=C2)C([H])=C1[N+][O-]=O</chem>                      | 92,64  | μM | IC50 | MOLT-4      |
| 502. | <chem>[H]C1=C([H])C(\C=C\C(=O)C2=C(C)N(N=N2)C2=CC=C(Br)C=C2)=CC=C1C1</chem>                              | 95,46  | μM | IC50 | MOLT-4      |
| 503. | <chem>[H]C1=C([H])C(=CC=C1\C=C\C(=O)C1=C(C)N(N=N1)C1=CC=C(F)C=C1)N(C)C</chem>                            | 102,53 | μM | IC50 | MOLT-4      |



|      |                                                                                                           |        |    |      |          |
|------|-----------------------------------------------------------------------------------------------------------|--------|----|------|----------|
| 504. | <chem>[H]C1=C(OC)C(OC)=CC=C1\C=C\C(=O)C1=C(C)N(N=N1)C1=CC=C(F)C=C1</chem>                                 | 109,65 | μM | IC50 | MOLT-4   |
| 505. | <chem>[H]C1=C([H])C(\C=C\C(=O)C2=C(C)N(N=N2)C2=CC=C(F)C=C2)=CC=C1O</chem>                                 | 81,73  | μM | IC50 | MOLT-4   |
| 506. | <chem>[H]C1=CC=C(\C=C\C(=O)C2=C(C)N(N=N2)C2=CC=C(F)C=C2)C(OC)=C1[H]</chem>                                | 104,76 | μM | IC50 | MOLT-4   |
| 507. | <chem>[H]C1=C([H])C(=CC=C1\C=C\C(=O)C1=C(C)N(N=N1)C1=CC=C(C=C1)C(O)=O)N(C)C</chem>                        | 44,99  | μM | IC50 | MOLT-4   |
| 508. | <chem>[H]C1=C(OC)C(OC)=CC=C1\C=C\C(=O)C1=C(C)N(N=N1)C1=CC=C(C=C1)C(O)=O</chem>                            | 102,3  | μM | IC50 | MOLT-4   |
| 509. | <chem>[H]C1=C([H])C(\C=C\C(=O)C2=C(C)N(N=N2)C2=CC=C(C=C2)C(O)=O)=CC=C1OC</chem>                           | 97,7   | μM | IC50 | MOLT-4   |
| 510. | <chem>[H]C1=CC=C(\C=C\C(=O)C2=C(C)N(N=N2)C2=CC=C(C=C2)C(O)=O)C(OC)=C1[H]</chem>                           | 94,4   | μM | IC50 | MOLT-4   |
| 511. | <chem>CC(C)(C)OC(=O)N1CCN(CC1)C(=S)SCC(=O)NC1=CC=C(C=C1)C(=O)\C=C\C1=CC=CC=C1F</chem>                     | 0,87   | μM | IC50 | MOLT-4   |
| 512. | <chem>[H]C1CC[C@]2([H])[C@]1([H])CC[C@]1([H])C3=C(CC[C@@]21[H])C=C1OC(=CC(=O)C1=C3)C1=CC=CC=C1</chem>     | 10,5   | μM | IC50 | MRC-5    |
| 513. | <chem>[H]C1CC[C@]2([H])[C@]1([H])CC[C@]1([H])C3=C(CC[C@@]21[H])C=C1OC(=CC(=O)C1=C3)C1=CC=C(C)C=C1</chem>  | 9,5    | μM | IC50 | MRC-5    |
| 514. | <chem>[H]C1CC[C@]2([H])[C@]1([H])CC[C@]1([H])C3=C(CC[C@@]21[H])C=C1OC(=CC(=O)C1=C3)C1=CC=C(Br)C=C1</chem> | >10    | μM | IC50 | MRC-5    |
| 515. | <chem>[H]C1=C([H])C(=CC=C1\C=C\C(=C)C1=C(C)N(N=N1)C1=CC=C(Br)C=C1)N(C)C</chem>                            | 92,23  | μM | IC50 | NCI-H226 |
| 516. | <chem>[H]C1=C(OC)C(OC)=CC=C1\C=C\C(=C)C1=C(C)N(N=N1)C1=CC=C(Br)C=C1</chem>                                | 70,69  | μM | IC50 | NCI-H226 |
| 517. | <chem>[H]C1=C([H])C(\C=C\C(=O)C2=C(C)N(N=N2)C2=CC=C(Br)C=C2)=CC=C1O</chem>                                | 90,71  | μM | IC50 | NCI-H226 |

|      |                                                                                       |        |    |      |          |
|------|---------------------------------------------------------------------------------------|--------|----|------|----------|
| 518. | <chem>[H]C1=CC=C(\ C=C\ C(=O)C2=C(C)N(N=N2)C2=CC=C(Br)C=C2)C(OC)=C1[H]</chem>         | 100,09 | μM | IC50 | NCI-H226 |
| 519. | <chem>[H]C1=CC=C(\ C=C\ C(=O)C2=C(C)N(N=N2)C2=CC=C(Br)C=C2)C([H])=C1[N+][O-]=O</chem> | 89,4   | μM | IC50 | NCI-H226 |
| 520. | <chem>[H]C1=C([H])C(\ C=C\ C(=O)C2=C(C)N(N=N2)C2=CC=C(Br)C=C2)=CC=C1C1</chem>         | 91,03  | μM | IC50 | NCI-H226 |
| 521. | <chem>[H]C1=C([H])C(=CC=C1\ C=C\ C(=O)C1=C(C)N(N=N1)C1=CC=C(F)C=C1)N(C)C</chem>       | 90,12  | μM | IC50 | NCI-H226 |
| 522. | <chem>[H]C1=C(OC)C(OC)=CC=C1\ C=C\ C(=O)C1=C(C)N(N=N1)C1=CC=C(F)C=C1</chem>           | 87,38  | μM | IC50 | NCI-H226 |
| 523. | <chem>[H]C1=C([H])C(\ C=C\ C(=O)C2=C(C)N(N=N2)C2=CC=C(F)C=C2)=CC=C1O</chem>           | 90,57  | μM | IC50 | NCI-H226 |
| 524. | <chem>[H]C1=CC=C(\ C=C\ C(=O)C2=C(C)N(N=N2)C2=CC=C(F)C=C2)C(OC)=C1[H]</chem>          | 53,06  | μM | IC50 | NCI-H226 |
| 525. | <chem>[H]C1=C([H])C(=CC=C1\ C=C\ C(=O)C1=C(C)N(N=N1)C1=CC=C(C=C1)C(O)=O)N(C)C</chem>  | 97,68  | μM | IC50 | NCI-H226 |
| 526. | <chem>[H]C1=C(OC)C(OC)=CC=C1\ C=C\ C(=O)C1=C(C)N(N=N1)C1=CC=C(C=C1)C(O)=O</chem>      | 100,07 | μM | IC50 | NCI-H226 |
| 527. | <chem>[H]C1=C([H])C(\ C=C\ C(=O)C2=C(C)N(N=N2)C2=CC=C(C=C2)C(O)=O)=CC=C1OC</chem>     | 104,58 | μM | IC50 | NCI-H226 |
| 528. | <chem>[H]C1=CC=C(\ C=C\ C(=O)C2=C(C)N(N=N2)C2=CC=C(C=C2)C(O)=O)C(OC)=C1[H]</chem>     | 98,49  | μM | IC50 | NCI-H226 |
| 529. | <chem>[H]C1=C([H])C(=CC=C1\ C=C\ C(=C)C1=C(C)N(N=N1)C1=CC=C(Br)C=C1)N(C)C</chem>      | 95,69  | μM | IC50 | NCI-H23  |
| 530. | <chem>[H]C1=C(OC)C(OC)=CC=C1\ C=C\ C(=C)C1=C(C)N(N=N1)C1=CC=C(Br)C=C1</chem>          | 59,9   | μM | IC50 | NCI-H23  |
| 531. | <chem>[H]C1=C([H])C(\ C=C\ C(=O)C2=C(C)N(N=N2)C2=CC=C(Br)C=C2)=CC=C1O</chem>          | 95,63  | μM | IC50 | NCI-H23  |

|      |                                                                          |        |    |      |           |
|------|--------------------------------------------------------------------------|--------|----|------|-----------|
| 532. | [H]C1=CC=C(\ C=C\ C(=O)C2=C(C)N(N=N2)C2=CC=C(Br)C=C2)C(OC)=C1[H]         | 79,4   | μM | IC50 | NCI-H23   |
| 533. | [H]C1=CC=C(\ C=C\ C(=O)C2=C(C)N(N=N2)C2=CC=C(Br)C=C2)C([H])=C1[N+][O-]=O | 87,61  | μM | IC50 | NCI-H23   |
| 534. | [H]C1=C([H])C(\ C=C\ C(=O)C2=C(C)N(N=N2)C2=CC=C(Br)C=C2)=CC=C1C1         | 93,49  | μM | IC50 | NCI-H23   |
| 535. | [H]C1=C([H])C(=CC=C1\ C=C\ C(=O)C1=C(C)N(N=N1)C1=CC=C(F)C=C1)N(C)C       | 97,08  | μM | IC50 | NCI-H23   |
| 536. | [H]C1=C(OC)C(OC)=CC=C1\ C=C\ C(=O)C1=C(C)N(N=N1)C1=CC=C(F)C=C1           | 92,76  | μM | IC50 | NCI-H23   |
| 537. | [H]C1=C([H])C(\ C=C\ C(=O)C2=C(C)N(N=N2)C2=CC=C(F)C=C2)=CC=C1OC          | 88,15  | μM | IC50 | NCI-H23   |
| 538. | [H]C1=CC=C(\ C=C\ C(=O)C2=C(C)N(N=N2)C2=CC=C(F)C=C2)C(OC)=C1[H]          | 42,93  | μM | IC50 | NCI-H23   |
| 539. | [H]C1=C([H])C(=CC=C1\ C=C\ C(=O)C1=C(C)N(N=N1)C1=CC=C(C=C1)C(O)=O)N(C)C  | 100,76 | μM | IC50 | NCI-H23   |
| 540. | [H]C1=C(OC)C(OC)=CC=C1\ C=C\ C(=O)C1=C(C)N(N=N1)C1=CC=C(C=C1)C(O)=O      | 104,58 | μM | IC50 | NCI-H23   |
| 541. | [H]C1=C([H])C(\ C=C\ C(=O)C2=C(C)N(N=N2)C2=CC=C(C=C2)C(O)=O)=CC=C1OC     | 98,49  | μM | IC50 | NCI-H23   |
| 542. | [H]C1=CC=C(\ C=C\ C(=O)C2=C(C)N(N=N2)C2=CC=C(C=C2)C(O)=O)C(OC)=C1[H]     | 87,58  | μM | IC50 | NCI-H23   |
| 543. | [H]C1=C([H])C(=CC=C1\ C=C\ C(=C)C1=C(C)N(N=N1)C1=CC=C(Br)C=C1)N(C)C      | 96,6   | μM | IC50 | NCI-H322M |
| 544. | [H]C1=C(OC)C(OC)=CC=C1\ C=C\ C(=C)C1=C(C)N(N=N1)C1=CC=C(Br)C=C1          | 95,33  | μM | IC50 | NCI-H322M |
| 545. | [H]C1=C([H])C(\ C=C\ C(=O)C2=C(C)N(N=N2)C2=CC=C(Br)C=C2)=CC=C1OC         | 92,63  | μM | IC50 | NCI-H322M |

|      |                                                                          |        |    |      |           |
|------|--------------------------------------------------------------------------|--------|----|------|-----------|
| 546. | [H]C1=CC=C(\ C=C\ C(=O)C2=C(C)N(N=N2)C2=CC=C(Br)C=C2)C(OC)=C1[H]         | 93,81  | μM | IC50 | NCI-H322M |
| 547. | [H]C1=CC=C(\ C=C\ C(=O)C2=C(C)N(N=N2)C2=CC=C(Br)C=C2)C([H])=C1[N+][O-]=O | 99,01  | μM | IC50 | NCI-H322M |
| 548. | [H]C1=C([H])C(\ C=C\ C(=O)C2=C(C)N(N=N2)C2=CC=C(Br)C=C2)=CC=C1C1         | 104,46 | μM | IC50 | NCI-H322M |
| 549. | [H]C1=C([H])C(=CC=C1\ C=C\ C(=O)C1=C(C)N(N=N1)C1=CC=C(F)C=C1)N(C)C       | 94,66  | μM | IC50 | NCI-H322M |
| 550. | [H]C1=C(OC)C(OC)=CC=C1\ C=C\ C(=O)C1=C(C)N(N=N1)C1=CC=C(F)C=C1           | 90,81  | μM | IC50 | NCI-H322M |
| 551. | [H]C1=C([H])C(\ C=C\ C(=O)C2=C(C)N(N=N2)C2=CC=C(F)C=C2)=CC=C1OC          | 70,6   | μM | IC50 | NCI-H322M |
| 552. | [H]C1=CC=C(\ C=C\ C(=O)C2=C(C)N(N=N2)C2=CC=C(F)C=C2)C(OC)=C1[H]          | 96,63  | μM | IC50 | NCI-H322M |
| 553. | [H]C1=C([H])C(=CC=C1\ C=C\ C(=O)C1=C(C)N(N=N1)C1=CC=C(C=C1)C(O)=O)N(C)C  | 91,34  | μM | IC50 | NCI-H322M |
| 554. | [H]C1=C(OC)C(OC)=CC=C1\ C=C\ C(=O)C1=C(C)N(N=N1)C1=CC=C(C=C1)C(O)=O      | 108,57 | μM | IC50 | NCI-H322M |
| 555. | [H]C1=C([H])C(\ C=C\ C(=O)C2=C(C)N(N=N2)C2=CC=C(C=C2)C(O)=O)=CC=C1OC     | 92,06  | μM | IC50 | NCI-H322M |
| 556. | [H]C1=CC=C(\ C=C\ C(=O)C2=C(C)N(N=N2)C2=CC=C(C=C2)C(O)=O)C(OC)=C1[H]     | 98,34  | μM | IC50 | NCI-H322M |
| 557. | [H]C1=C([H])C(=CC=C1\ C=C\ C(=C)C1=C(C)N(N=N1)C1=CC=C(Br)C=C1)N(C)C      | 100,35 | μM | IC50 | NCI-H460  |
| 558. | [H]C1=C(OC)C(OC)=CC=C1\ C=C\ C(=C)C1=C(C)N(N=N1)C1=CC=C(Br)C=C1          | 84,35  | μM | IC50 | NCI-H460  |
| 559. | [H]C1=C([H])C(\ C=C\ C(=O)C2=C(C)N(N=N2)C2=CC=C(Br)C=C2)=CC=C1OC         | 101,59 | μM | IC50 | NCI-H460  |

|      |                                                                                                           |        |    |      |          |
|------|-----------------------------------------------------------------------------------------------------------|--------|----|------|----------|
| 560. | <chem>[H]C1=CC=C(\ C=C\ C(=O)C2=C(C)N(N=N2)C2=CC=C(Br)C=C2)C(OC)=C1[H]</chem>                             | 102,78 | μM | IC50 | NCI-H460 |
| 561. | <chem>[H]C1=CC=C(\ C=C\ C(=O)C2=C(C)N(N=N2)C2=CC=C(Br)C=C2)C([H])=C1[N+][O-]=O</chem>                     | 109,24 | μM | IC50 | NCI-H460 |
| 562. | <chem>[H]C1=C([H])C(\ C=C\ C(=O)C2=C(C)N(N=N2)C2=CC=C(Br)C=C2)=CC=C1C1</chem>                             | 92,45  | μM | IC50 | NCI-H460 |
| 563. | <chem>[H]C1=C([H])C(=CC=C1\ C=C\ C(=O)C1=C(C)N(N=N1)C1=CC=C(F)C=C1)N(C)C</chem>                           | 96,61  | μM | IC50 | NCI-H460 |
| 564. | <chem>[H]C1=C(OC)C(OC)=CC=C1\ C=C\ C(=O)C1=C(C)N(N=N1)C1=CC=C(F)C=C1</chem>                               | 28,43  | μM | IC50 | NCI-H460 |
| 565. | <chem>[H]C1=C([H])C(\ C=C\ C(=O)C2=C(C)N(N=N2)C2=CC=C(F)C=C2)=CC=C1O</chem>                               | 110,03 | μM | IC50 | NCI-H460 |
| 566. | <chem>[H]C1=CC=C(\ C=C\ C(=O)C2=C(C)N(N=N2)C2=CC=C(F)C=C2)C(OC)=C1[H]</chem>                              | 107,26 | μM | IC50 | NCI-H460 |
| 567. | <chem>[H]C1=C([H])C(=CC=C1\ C=C\ C(=O)C1=C(C)N(N=N1)C1=CC=C(C=C1)C(O)=O)N(C)C</chem>                      | 112,37 | μM | IC50 | NCI-H460 |
| 568. | <chem>[H]C1=C(OC)C(OC)=CC=C1\ C=C\ C(=O)C1=C(C)N(N=N1)C1=CC=C(C=C1)C(O)=O</chem>                          | 96,14  | μM | IC50 | NCI-H460 |
| 569. | <chem>[H]C1=C([H])C(\ C=C\ C(=O)C2=C(C)N(N=N2)C2=CC=C(C=C2)C(O)=O)=CC=C1OC</chem>                         | 101,71 | μM | IC50 | NCI-H460 |
| 570. | <chem>[H]C1=CC=C(\ C=C\ C(=O)C2=C(C)N(N=N2)C2=CC=C(C=C2)C(O)=O)C(OC)=C1[H]</chem>                         | 28,43  | μM | IC50 | NCI-H460 |
| 571. | <chem>COC1=CC=C(\ C=C\ C(=O)C2=CC(OC)=C(OC)C(OC)=C2)C=C1OC(=O)CCC(=O)O[Pt]([NH3])([NH3])(O)(Cl)Cl</chem>  | 0,45   | μM | IC50 | NCI-H460 |
| 572. | <chem>COC1=CC=C(\ C=C\ C(=O)C2=CC(OC)=C(OC)C(OC)=C2)C=C1OC(=O)CCC(=O)O[Pt]([NH3])([NH3])(Cl)(Cl)Cl</chem> | 0,61   | μM | IC50 | NCI-H460 |
| 573. | <chem>COC1=CC=C(\ C=C\ C(=O)C2=CC(OC)=C(OC)C(OC)=C2)C=C1OC(=O)CCCC(=O)O[Pt]([NH3])([NH3])(O)(Cl)Cl</chem> | 0,37   | μM | IC50 | NCI-H460 |

|      |                                                                                                          |       |    |      |          |
|------|----------------------------------------------------------------------------------------------------------|-------|----|------|----------|
| 574. | <chem>COC1=CC=C(\C=C\C(=O)C2=CC(OC)=C(OC)C(OC)=C2)C=C1OC(=O)CCCC(=O)O[Pt]([NH3])([NH3])(Cl)(Cl)Cl</chem> | 0,55  | μM | IC50 | NCI-H460 |
| 575. | <chem>[H]C1=C([H])C(=CC=C1\C=C\C(=C)C1=C(C)N(N=N1)C1=CC=C(Br)C=C1)N(C)C</chem>                           | 89,51 | μM | IC50 | NCI-H522 |
| 576. | <chem>[H]C1=C(OC)C(OC)=CC=C1\C=C\C(=C)C1=C(C)N(N=N1)C1=CC=C(Br)C=C1</chem>                               | 67,73 | μM | IC50 | NCI-H522 |
| 577. | <chem>[H]C1=C([H])C(\C=C\C(=O)C2=C(C)N(N=N2)C2=CC=C(Br)C=C2)=CC=C1OC</chem>                              | 87,91 | μM | IC50 | NCI-H522 |
| 578. | <chem>[H]C1=CC=C(\C=C\C(=O)C2=C(C)N(N=N2)C2=CC=C(Br)C=C2)C(OC)=C1[H]</chem>                              | 84,85 | μM | IC50 | NCI-H522 |
| 579. | <chem>[H]C1=CC=C(\C=C\C(=O)C2=C(C)N(N=N2)C2=CC=C(Br)C=C2)C([H])=C1[N+][O-]=O</chem>                      | 86,35 | μM | IC50 | NCI-H522 |
| 580. | <chem>[H]C1=C([H])C(\C=C\C(=O)C2=C(C)N(N=N2)C2=CC=C(Br)C=C2)=CC=C1C1</chem>                              | 89,92 | μM | IC50 | NCI-H522 |
| 581. | <chem>[H]C1=C([H])C(=CC=C1\C=C\C(=O)C1=C(C)N(N=N1)C1=CC=C(F)C=C1)N(C)C</chem>                            | 87,66 | μM | IC50 | NCI-H522 |
| 582. | <chem>[H]C1=C(OC)C(OC)=CC=C1\C=C\C(=O)C1=C(C)N(N=N1)C1=CC=C(F)C=C1</chem>                                | 75,77 | μM | IC50 | NCI-H522 |
| 583. | <chem>[H]C1=C([H])C(\C=C\C(=O)C2=C(C)N(N=N2)C2=CC=C(F)C=C2)=CC=C1OC</chem>                               | 84,37 | μM | IC50 | NCI-H522 |
| 584. | <chem>[H]C1=CC=C(\C=C\C(=O)C2=C(C)N(N=N2)C2=CC=C(F)C=C2)C(OC)=C1[H]</chem>                               | 53,96 | μM | IC50 | NCI-H522 |
| 585. | <chem>[H]C1=C([H])C(=CC=C1\C=C\C(=O)C1=C(C)N(N=N1)C1=CC=C(C=C1)C(O)=O)N(C)C</chem>                       | 92,91 | μM | IC50 | NCI-H522 |
| 586. | <chem>[H]C1=C(OC)C(OC)=CC=C1\C=C\C(=O)C1=C(C)N(N=N1)C1=CC=C(C=C1)C(O)=O</chem>                           | 88,38 | μM | IC50 | NCI-H522 |
| 587. | <chem>[H]C1=C([H])C(\C=C\C(=O)C2=C(C)N(N=N2)C2=CC=C(C=C2)C(O)=O)=CC=C1OC</chem>                          | 83,77 | μM | IC50 | NCI-H522 |

|      |                                                                                                           |       |    |      |           |
|------|-----------------------------------------------------------------------------------------------------------|-------|----|------|-----------|
| 588. | <chem>[H]C1=CC=C(\C=C\C(=O)C2=C(C)N(N=N2)C2=CC=C(C=C2)C(O)=O)C(OC)=C1[H]</chem>                           | 82,4  | μM | IC50 | NCI-H522  |
| 589. | <chem>COC1=CC(=CC(OC)=C1OC)C(=O)\C=C\C1=CNC2=CC=CC=C12</chem>                                             | 0,03  | μM | IC50 | PaCa-2    |
| 590. | <chem>COC1=CC(=CC(OC)=C1OC)C(=O)\C=C\C1=CN(C)C2=CC=CC=C12</chem>                                          | 0,091 | μM | IC50 | PaCa-2    |
| 591. | <chem>ClC1=CC=C(\C=C\C(=O)C2=CC=CC=C2NS(=O)(=O)C2=CC=CC=C2)C=C1</chem>                                    | 2,4   | μM | IC50 | PC-3      |
| 592. | <chem>[H]C1CC[C@]2([H])[C@]1([H])CC[C@]1([H])C3=C(CC[C@@]21[H])C=C1OC(=CC(=O)C1=C3)C1=CC=CC=C1</chem>     | 6,2   | μM | IC50 | PC-3      |
| 593. | <chem>[H]C1CC[C@]2([H])[C@]1([H])CC[C@]1([H])C3=C(CC[C@@]21[H])C=C1OC(=CC(=O)C1=C3)C1=CC=C(C)C=C1</chem>  | 8,7   | μM | IC50 | PC-3      |
| 594. | <chem>[H]C1CC[C@]2([H])[C@]1([H])CC[C@]1([H])C3=C(CC[C@@]21[H])C=C1OC(=CC(=O)C1=C3)C1=CC=C(Br)C=C1</chem> | 9,5   | μM | IC50 | PC-3      |
| 595. | <chem>COC1=CC=C(\C=C\C(=O)C2=C(C)N(N=N2)C2=CC=C(Cl)C=C2)C=C1OC</chem>                                     | 0,64  | μM | IC50 | RPMI-8226 |
| 596. | <chem>[H]C1=C(OC)C(OC)=CC=C1\C=C\C(=C)C1=C(C)N(N=N1)C1=CC=C(Br)C=C1</chem>                                | 67,93 | μM | IC50 | RPMI-8226 |
| 597. | <chem>[H]C1=C([H])C(\C=C\C(=O)C2=C(C)N(N=N2)C2=CC=C(Br)C=C2)=CC=C1OC</chem>                               | 10,53 | μM | IC50 | RPMI-8226 |
| 598. | <chem>[H]C1=CC=C(\C=C\C(=O)C2=C(C)N(N=N2)C2=CC=C(Br)C=C2)C(OC)=C1[H]</chem>                               | 93,81 | μM | IC50 | RPMI-8226 |
| 599. | <chem>[H]C1=CC=C(\C=C\C(=O)C2=C(C)N(N=N2)C2=CC=C(Br)C=C2)C([H])=C1[N+][O-]=O</chem>                       | 61,31 | μM | IC50 | RPMI-8226 |
| 600. | <chem>[H]C1=C([H])C(\C=C\C(=O)C2=C(C)N(N=N2)C2=CC=C(Br)C=C2)=CC=C1C1</chem>                               | 17,98 | μM | IC50 | RPMI-8226 |
| 601. | <chem>[H]C1=C([H])C(=CC=C1\C=C\C(=O)C1=C(C)N(N=N1)C1=CC=C(F)C=C1)N(C)C</chem>                             | 87,57 | μM | IC50 | RPMI-8226 |
| 602. | <chem>[H]C1=C(OC)C(OC)=CC=C1\C=C\C(=O)C1=C(C)N(N=N1)C1=CC=C(F)C=C1</chem>                                 | 89,72 | μM | IC50 | RPMI-8226 |
| 603. | <chem>[H]C1=C([H])C(\C=C\C(=O)C2=C(C)N(N=N2)C2=CC=C(F)C=C2)=CC=C1OC</chem>                                | 54,14 | μM | IC50 | RPMI-8226 |

|      |                                                                                          |        |    |      |           |
|------|------------------------------------------------------------------------------------------|--------|----|------|-----------|
| 604. | <chem>[H]C1=CC=C(\ C=C\ C(=O)C2=C(C)N(N=N2)C2=CC=C(F)C=C2)C(OC)=C1[H]</chem>             | 67,78  | μM | IC50 | RPMI-8226 |
| 605. | <chem>[H]C1=C([H])C(=CC=C1\ C=C\ C(=O)C1=C(C)N(N=N1)C1=CC=C(C=C1)C(O)=O)N(C)C</chem>     | 20,94  | μM | IC50 | RPMI-8226 |
| 606. | <chem>[H]C1=C(OC)C(OC)=CC=C1\ C=C\ C(=O)C1=C(C)N(N=N1)C1=CC=C(C=C1)C(O)=O</chem>         | 95,13  | μM | IC50 | RPMI-8226 |
| 607. | <chem>[H]C1=C([H])C(\ C=C\ C(=O)C2=C(C)N(N=N2)C2=CC=C(C=C2)C(O)=O)=CC=C1OC</chem>        | 99,41  | μM | IC50 | RPMI-8226 |
| 608. | <chem>[H]C1=CC=C(\ C=C\ C(=O)C2=C(C)N(N=N2)C2=CC=C(C=C2)C(O)=O)C(OC)=C1[H]</chem>        | 105,37 | μM | IC50 | RPMI-8226 |
| 609. | <chem>CCCCN1C(=O)C(\ C=C\ C(=O)\ C=C\ C2=CC3=C(C=CC=C3)N(CCCC)C2=O)=CC2=C1C=CC=C2</chem> | 0,32   | μM | GI50 | RPMI-8226 |
| 610. | <chem>ClC1=CC=C(\ C=C\ C(=O)C2=CC=CC=C2NS(=O)(=O)C2=CC=CC=C2)C=C1</chem>                 | 2,1    | μM | IC50 | SF-295    |
| 611. | <chem>COC1=CC=C(C=C1)C1=CC2=CC=CC=C2N=C1\ C=C\ C(=O)C1=CC=CC=C2</chem>                   | 0,7    | μM | IC50 | SKBR-3    |
| 612. | <chem>COC1=CC=C(C=C1)C1=CC2=CC=CC=C2N=C1\ C=C\ C(=O)C1=CC(OC)=C(O)C(OC)=C1</chem>        | 0,78   | μM | IC50 | SKBR-3    |
| 613. | <chem>C1C(NN=C1C1=C2C=CC=CC2=CC2=C1C=CC=C2)C1=CC=CC=C1</chem>                            | 260    | μM | IC50 | SK-N-SH   |
| 614. | <chem>ClC1=CC=C(C=C1)C1CC(=NN1)C1=C2C=CC=CC2=CC2=C1C=CC=C2</chem>                        | 290    | μM | IC50 | SK-N-SH   |
| 615. | <chem>FC1=CC=C(C=C1)C1CC(=NN1)C1=C2C=CC=CC2=CC2=C1C=CC=C2</chem>                         | 254,22 | μM | IC50 | SK-N-SH   |
| 616. | <chem>CC1=CC=C(C=C1)C1CC(=NN1)C1=C2C=CC=CC2=CC2=C1C=CC=C2</chem>                         | 258,42 | μM | IC50 | SK-N-SH   |
| 617. | <chem>ClC1=CC(=CC=C1)C1CC(=NN1)C1=C2C=CC=CC2=CC2=C1C=CC=C2</chem>                        | 254,23 | μM | IC50 | SK-N-SH   |
| 618. | <chem>[O-][N+](=O)C1=CC=C(C=C1)C1CC(=NN1)C1=C2C=CC=CC2=CC2=C1C=CC=C2</chem>              | 250,66 | μM | IC50 | SK-N-SH   |
| 619. | <chem>BrC1=CC=C(C=C1)C1CC(=NN1)C1=C2C=CC=CC2=CC2=C1C=CC=C2</chem>                        | 240,26 | μM | IC50 | SK-N-SH   |
| 620. | <chem>FC1=CC(=CC=C1)C1CC(=NN1)C1=C2C=CC=CC2=CC2=C1C=CC=C2</chem>                         | 250,29 | μM | IC50 | SK-N-SH   |
| 621. | <chem>[O-][N+](=O)C1=CC(=CC=C1)C1CC(=NN1)C1=C2C=CC=CC2=CC2=C1C=CC=C2</chem>              | 3,55   | μM | IC50 | SK-N-SH   |
| 622. | <chem>CN(C)C1=CC=C(C=C1)C1CC(=NN1)C1=C2C=CC=CC2=CC2=C1C=CC=C2</chem>                     | 260,22 | μM | IC50 | SK-N-SH   |



|      |                                                                                                  |        |    |      |           |
|------|--------------------------------------------------------------------------------------------------|--------|----|------|-----------|
| 623. | <chem>C1C(NN=C1C1=C2C=CC=CC2=CC2=C1C=CC=C2)C1=CC=C(C=C1)C1=CC=C</chem><br>O1                     | 1,88   | μM | IC50 | SK-N-SH   |
| 624. | <chem>C1C(NN=C1C1=C2C=CC=CC2=CC2=C1C=CC=C2)C1=CC=CO1</chem>                                      | 2      | μM | IC50 | SK-N-SH   |
| 625. | <chem>COC1=CC(=CC(OC)=C1OC)C1CC(=NN1)C1=C2C=CC=CC2=CC2=C1C=CC=C</chem><br>C2                     | 23,42  | μM | IC50 | SK-N-SH   |
| 626. | <chem>COC1=C(OC)C=C(C=C1)C1CC(=NN1)C1=C2C=CC=CC2=CC2=C1C=CC=C2</chem>                            | 25,33  | μM | IC50 | SK-N-SH   |
| 627. | <chem>COC1=CC=C(C=C1)C1CC(=NN1)C1=C2C=CC=CC2=CC2=C1C=CC=C2</chem>                                | 253,88 | μM | IC50 | SK-N-SH   |
| 628. | <chem>C1C(NN=C1C1=C2C=CC=CC2=CC2=C1C=CC=C2)C1=CC=NC=C1</chem>                                    | 58,33  | μM | IC50 | SK-N-SH   |
| 629. | <chem>COC1=C(O)C(C(=O)\C=C\C2=CC=C(O)C=C2)=C(OC)C(OC)=C1OC</chem>                                | 56,41  | μM | IC50 | SK-OV-3   |
| 630. | <chem>COC1=CC(\C=C\C(=O)C2=C(OC)C(OC)=C(OC)C(OC)=C2O)=CC=C1O</chem>                              | 32,53  | μM | IC50 | SK-OV-3   |
| 631. | <chem>COC1=CC=C(\C=C\C(=O)C2=C(OC)C(OC)=C(OC)C(OC)=C2O)C=C1O</chem>                              | 1,6    | μM | IC50 | SK-OV-3   |
| 632. | <chem>COC1=C(O)C(O)=CC(\C=C\C(=O)C2=C(OC)C(OC)=C(OC)C(OC)=C2O)=C1</chem>                         | 48,4   | μM | IC50 | SK-OV-3   |
| 633. | <chem>COC1=CC(\C=C\C(=O)C2=C(OC)C(OC)=C(OC)C(OC)=C2O)=CC(OC)=C1O</chem><br>C                     | 10,53  | μM | IC50 | SK-OV-3   |
| 634. | <chem>COC1=CC(\C=C\C(=O)C2=CC=C3OC(=O)N(CN4CCCCC4)C3=C2)=CC(OC)=C1OC</chem>                      | 3,6    | μM | IC50 | SKW-3     |
| 635. | <chem>COC1=CC(\C=C\C(=O)C2=CC=C3OC(=O)N(CN4CCOCC4)C3=C2)=CC(OC)=C1OC</chem>                      | 7,1    | μM | IC50 | SKW-3     |
| 636. | <chem>COC1=CC(\C=C\C(=O)C2=CC=C3OC(=O)N(CN4CCSCC4)C3=C2)=CC(OC)=C1OC</chem>                      | 5,4    | μM | IC50 | SKW-3     |
| 637. | <chem>COC1=CC(\C=C\C(=O)C2=CC=C3OC(=O)N(CN4CCN(CC5=CC=CC=C5)CC4)C3=C2)=CC(OC)=C1OC</chem>        | 3,7    | μM | IC50 | SKW-3     |
| 638. | <chem>COC1=CC(\C=C\C(=O)C2=CC=C3OC(=O)N(CN4CCN(CC4)C4=C(OC)C=C</chem><br>C=C4)C3=C2)=CC(OC)=C1OC | 3,6    | μM | IC50 | SKW-3     |
| 639. | <chem>CC1=CC=C(C=C1)C(=O)\C=C\C1=CC=C(\C=N\NC(N)=N)C=C1</chem>                                   | 3,05   | μM | IC50 | SMMC-7721 |
| 640. | <chem>COC1=CC(OC)=C(C=C1S(N)(=O)=O)C(=O)\C=C\C1=CC=C(C)C=C1</chem>                               | 1,84   | μM | IC50 | SNB-75    |
| 641. | <chem>CCCCN1C(=O)C(\C=C\C(=O)\C=C\C2=CC3=C(C=CC=C3)N(CCCC)C2=O)=CC2=C1C=CC=C2</chem>             | 0,32   | μM | GI50 | SR        |

|      |                                                                                     |       |         |                 |          |
|------|-------------------------------------------------------------------------------------|-------|---------|-----------------|----------|
| 642. | <chem>O=C(\C=C\C1=CN(N=C1C1=CC=CS1)C1=CC=CC=C1)C1=CC=CS1</chem>                     | 56,9  | %       | % sobrevivência | T-47D    |
| 643. | <chem>CCC1=CC=C(\C=C\C(=O)C2=CC=C(C=C2)[N+](O-)=O)C=C1</chem>                       | 4,756 | μM      | IC50            | tipo L   |
| 644. | <chem>OCC1=CC=C(\C=C\C(=O)C2=CC=C(OC(=O)CO[N+](O-)=O)C=C2)C=C1CO</chem>             | 3,608 | μM      | IC50            | tipo L   |
| 645. | <chem>CC1=CC(=CC(\C=C/C(=O)C2=CC=C(Cl)C=C2)=C1)C(=O)C1=CC=C(O[N+](O-)=O)C=C1</chem> | 5,211 | μM      | IC50            | tipo L   |
| 646. | <chem>OC1=CC=C(C(=O)\C=C\C2=CC=C(O)C(O)=C2)C(OC2=CC=CC=C2)=C1</chem>                | 14,6  | mM      | IC50            | TNF-α    |
| 647. | <chem>COC1=CC(\C=C\C(=O)C2=CC(OC)=C(OC)C=C2)=CC(OC)=C1OC</chem>                     | 19,5  | μM      | IC50            | U87      |
| 648. | <chem>CN(C)C1=CC=C(\C=C\C(=O)C2=CC=C(C)C=C2)C=C1</chem>                             | 61,24 | %       | % sobrevivência | UACC-257 |
| 649. | <chem>CN(C)C1=CC=C(\C=C\C(=O)C2=CC=CS2)C=C1</chem>                                  | 67,64 | %       | % sobrevivência | UACC-257 |
| 650. | <chem>COC1=CC(OC)=C(C(=O)\C=C\C2=CC=CC=C2)C(O)=C1</chem>                            | 25    | Unidade | IC50            | LoVo     |
| 651. | <chem>COC1=CC2=C(C(=O)CC(O2)C2=CC=CC=C2)C(OC)=C1</chem>                             | 50    | μM      | IC50            | LoVo     |
| 652. | <chem>CC1=NC(C)=C(C)N=C1\C=C\C(=O)C1=CC=CO1</chem>                                  | 7,9   | μM      | IC50            | A375     |
| 653. | <chem>COC1=CC=C2OC(=CC2=C1)C(=O)\C=C\C1=C(C)N=C(C)C(C)=N1</chem>                    | 5,16  | μM      | IC50            | A375     |
| 654. | <chem>CC1=CSC(=C1)C1=CC=C(C=C1)C(=O)\C=C\C1=NC(C)=C(C)N=C1C</chem>                  | 3,68  | μM      | IC50            | A375     |
| 655. | <chem>CCOC1=CC=C(C=C1)C(=O)\C=C\C1=CC=C(Cl)C=C1</chem>                              | 49,17 | μM      | IC50            | A-375    |
| 656. | <chem>CCOC1=CC=C(C=C1)C(=O)\C=C\C1=CC=C(Br)C=C1</chem>                              | 40,76 | μM      | ic50            | A-375    |
| 657. | <chem>CCOC1=CC=C(C=C1)C(=O)\C=C\C1=CC=C(C=C1)N(O)O</chem>                           | 76,01 | μM      | ic50            | A-375    |
| 658. | <chem>CCOC1=CC=C(C=C1)C(=O)\C=C\C1=CC=C(OC)C=C1</chem>                              | 71,19 | μM      | ic50            | A-375    |
| 659. | <chem>CCOC1=CC=C(C=C1)C(=O)\C=C\C1=CC=C(OC)C(OC)=C1</chem>                          | 47,06 | μM      | ic50            | A-375    |
